# Supplementary material for: Genome-wide identification and expression of TIFY family in cassava (Manihot esculenta Crantz)
Source: Front Plant Sci. 2022 Oct 5;13:1017840. doi: 10.3389/fpls.2022.1017840 (PMC9581314; doi:10.3389/fpls.2022.1017840)
Supplement: Supplementary file 6 [file Table_1.xlsx]

## Sheet: Table S1
Table S1. The JAZ, PPD, and ZML genes used for phylogenetic analysis
Brachypodium distachyon		Brassica napus		Vitis vinifera		Gossypium arboretum		Arabidopsis		Rice		P. trichocarpa		Cassava
Gene ID	Gene Name	Gene ID	Gene Name	Gene ID	Gene Name	Gene ID	Gene Name	Gene ID	Gene Name	Gene ID	Gene Name	Gene ID	Gene Name	Gene ID	Gene Name
Bradi1g58490	BdTIFY5	BnaC08g18640D	BnaJAZ1-C3	XM_002272327	VvJAZ4	KT312822	GaJAZ3	AT1G19180	AtJAZ1	LOC_Os03g47970	OsZML2	Potri.002G048500	PtPPD1	Manes.03G042500	MeJAZ1
Bradi5g08650	BdTIFY9a	BnaA07g30200D	BnaJAZ6-A1	XM_002277733	VvJAZ5	KT312824	GaJAZ4	AT1G74950	AtJAZ2	LOC_Os03g52450	OsZML3	Potri.005G214300	PtPPD2	Manes.03G055200	MeJAZ2
Bradi4g31240	BdTIFY10c	BnaC06g31830D	BnaJAZ9-C2	XM_002277121	VvJAZ9	KT312825	GaJAZ5	AT4G24470	AtZIM	LOC_Os02g05510	OsZML1	Potri.002G110800	PtZML1	Manes.04G147900	MeJAZ3
Bradi1g72610	BdTIFY11a	BnaC03g19040D	BnaJAZ7-C3	CBI25038	VvPPD2	KT312830	GaJAZ7	AT1G51600	AtZML2	LOC_Os06g48534	OsZML4	Potri.002G110900	PtZML2	Manes.06G004000	MeJAZ4
				XM_002270325	VvZML1	KT312831	GaJAZ8	AT3G21175	AtZML1	LOC_Os04g55920	OsJAZ1	Potri.005G152500	PtZML3	Manes.07G023500	MeJAZ5
				XM_002283717	VvZML3	KT312832	GaJAZ9	AT3G43440	AtJAZ11	LOC_Os07g05830	OsJAZ2	Potri.005G152800	PtZML4	Manes.08G102800	MeJAZ6
						KT312838	GaJAZ13	AT5G20900	AtJAZ12	LOC_Os08g33160	OsJAZ3	Potri.007G116500	PtZML5	Manes.09G186200	MeJAZ7
								AT4G14713	AtPPD1	LOC_Os09g23660	OsJAZ4	Potri.007G116700	PtZML6	Manes.11G016700	MeJAZ8
								AT4G14720	AtPPD2	LOC_Os04g32480	OsJAZ5	Potri.010G251600	PtZML7	Manes.14G172400	MeJAZ9
								AT1G30135	AtJAZ8	LOC_Os03g28940	OsJAZ6	Potri.017G042200	PtZML8	Manes.15G122700	MeJAZ10
								AT2G34600	AtJAZ7	LOC_Os07g42370	OsJAZ7	Potri.001G062500	PtJAZ1	Manes.15G122900	MeJAZ11
								AT1G48500	AtJAZ4	LOC_Os09g26780	OsJAZ8	Potri.001G166200	PtJAZ2	Manes.15G133000	MeJAZ12
								AT3G17860	AtJAZ3	LOC_Os03g08310	OsJAZ9	Potri.003G068900	PtJAZ3	Manes.16G088300	MeJAZ13
								AT1G70700	AtJAZ9	LOC_Os03g08330	OsJAZ10	Potri.003G165000	PtJAZ4	Manes.16G093500	MeJAZ14
								AT5G13220	AtJAZ10	LOC_Os03g08320	OsJAZ11	Potri.006G139400	PtJAZ5	Manes.17G071600	MeJAZ15
								AT1G17380	AtJAZ5	LOC_Os10g25290	OsJAZ12	Potri.006G217200	PtJAZ6	Manes.17G082100	MeJAZ16
								AT1G72450	AtJAZ6	LOC_Os10g25230	OsJAZ13	Potri.008G133400	PtJAZ7	Manes.05G189500	MeZML1
										LOC_Os10g25250	OsJAZ14	Potri.010G108200	PtJAZ8	Manes.05G189600	MeZML2
										LOC_Os03g27900	OsJAZ15	Potri.011G083900	PtJAZ9	Manes.07G041200	MeZML3
												Potri.012G044900	PtJAZ10	Manes.07G041300	MeZML4
												Potri.015G035800	PtJAZ11	Manes.10G097400	MeZML5
												Potri.018G047100	PtJAZ12	Manes.18G056300	MeZML6
														Manes.18G056400	MeZML7
														Manes.03G173500	MePPD1
														Manes.05G081400	MePPD2
														Manes.15G032500	MePPD3

## Sheet: Table S2
Table S2. The accession number of transcriptomic data in NCBI.
Sample name	Accession number
Arg7_leaf	SRR1299009
KU50_leaf	SRR1299000
W14_leaf	SRR1298998
Arg7_early storage root	SRR1299005
Arg7_middle storage root	SRR1299006
Arg7_last storage root	SRR1299007
KU50_early storage root	SRR1299001
KU50_middle storage root	SRR1299002
KU50_last storage root	SRR1299003
W14_root	SRR1298996
ABA treatment	SRP278395

## Sheet: Table S3
Table S3. Sequences of primers used in qRT-PCR.
Gene Name	Forward primer sequence (5′ → 3′)	Reverse primer sequence (5′ → 3′)
MeJAZ1	CAGGCGGCAACAACAATGAA	CCGAGGAGTAGCCCTGTTTC
MeJAZ2	TGCTGACATGAAGAAGGCTGT	AGCTTTGCTTGTGGTTGTGG
MeJAZ3	GGCCAGGTGATAGCTTACGA	ATTGGCGCTTGCTTTGCTTG
MeJAZ4	ATCACTCCCAGCAAACGAGG	TGTTCCCAACGGAAGCAAGA
MeJAZ5	TCTTCAGCGGCACAACTCAC	ACGTAGAGCTTTCACCAGCAA
MeJAZ6	GCCTCGCTTCCCTAAGTTCC	GGAGTGGAAGGCACCGAAAA
MeJAZ7	ACGCAAGGAGAGGTTGACTT	TCACGGTCTTCCCACTTCTG
MeJAZ8	GCACTGTTTCCACTTCTGCTG	CATCAGGTGTAGGACGAGCA
MeJAZ9	TATCCAGTTCATCGCCCCCA	TCACCCACATTTTGCCCAGA
MeJAZ10	AAGACCACCACCGCATAACG	CCGTAACATCTCCAGCGCAA
MeJAZ11	TGAACTCCGCCTTTTTCCCT	GCTGTGGGCTTTGCTCATTT
MeJAZ12	AAGGCATCATTGGCTCGGTT	TTGTCGTTACCCTCCTTGCT
MeJAZ13	TTCTCCGAACCAACAGCTCC	GACCTGGTAAGAACTGGCGT
MeJAZ14	CGGAAGGCGTCCAGTTTTTC	CATGGTTGTTGACGCCTGAC
MeJAZ15	TCATCGTCGTCGGGAAAACC	CCGCCGATTCATGTTGTAGG
MeJAZ16	TGTCAAGTCCAGCCACCAAG	CTTGAGAGACGGGAGCAAGG
MePPD1	TCCAAACCACCGGCTACTTC	TCTCTCCCGGTTGGGAATCT
MePPD2	TTTCGCGGTCTCCTCTTGAC	AGGGTTATCTGGACGGGGAA
MePPD3	GCTGCATTTGTCCATGCCAC	GCTTGACCCTCTACATCTGGG
MeZML1	TGCGCAGAGTTGTCTACAGG	TATTCGCCCACATCAAGCCA
MeZML2	ACCCCTGACAAGGTTCAAGC	CGCACCCCTTTGGTTTTGAG
MeZML3	CTGCGGTTACGCCTCAAAAA	TTCCGGCAAGTGTACCGAAT
MeZML4	AGGATGCAGCGTAAGAAGGG	CGACGCATCATTGGAGTGGA
MeZML5	TGCATGTGGTCTCAAGTGGG	AGCCCGTTAGCTTCACCTTC
MeZML6	AATCAGATCGCTGCTCCTGC	CACCAGTAGCGTTTCCGTCT
MeZML7	CAGATCGAGGAAGACGACGG	GGTCCTTGACGCCATAACCA

## Sheet: Table S4
Table S4. A catalog of cassava TIFY proteins with their HMM profiles.
TIFY name	Alignment		Envelope		HMM Accession	HMM name	HMM		HMM length	Bit score	Individual E-value	Conditional E-value	Database significant	Outcompeted	Clan
	Start	End	Start	End			Start	End
MeJAZ1	127	160	127	160	PF06200.17	tify	1	34	34	67.07	6.5e-19	6.6e-23	1	0	CL0281
	227	252	227	252	PF09425.13	Jas_motif	1	26	26	53.03	2.3e-14	2.4e-18	1	0
MeJAZ2	147	171	147	172	PF09425.13	Jas_motif	1	25	26	44.22	1.3e-11	1.4e-15	1	0	CL0281
	53	85	53	85	PF06200.17	tify	2	34	34	55.8	2.2e-15	2.2e-19	1	0
MeJAZ3	122	154	121	154	PF06200.17	tify	2	34	34	60.85	5.7e-17	5.8e-21	1	0	CL0281
	196	217	192	217	PF09425.13	Jas_motif	5	26	26	39	5.7e-10	5.8e-14	1	0
MeJAZ4	208	239	206	239	PF06200.17	tify	3	34	34	68.18	2.9e-19	3e-23	1	0	CL0281
	335	359	335	360	PF09425.13	Jas_motif	1	25	26	46.17	3.3e-12	3.3e-16	1	0
MeJAZ5	124	156	123	156	PF06200.17	tify	2	34	34	58.82	2.5e-16	2.5e-20	1	0	CL0281
	194	219	194	219	PF09425.13	Jas_motif	1	26	26	43.05	3.1e-11	3.1e-15	1	0
MeJAZ6	106	134	104	136	PF06200.17	tify	3	32	34	40.74	1.1e-10	1.1e-14	1	0	CL0281
	162	186	162	187	PF09425.13	Jas_motif	1	25	26	49.53	2.9e-13	2.9e-17	1	0
MeJAZ7	105	135	104	136	PF06200.17	tify	2	33	34	51.03	6.7e-14	6.9e-18	1	0	CL0281
	160	179	160	183	PF09425.13	Jas_motif	1	20	26	41.31	1.1e-10	1.1e-14	1	0
MeJAZ8	125	157	124	157	PF06200.17	tify	2	34	34	57.7	5.5e-16	5.6e-20	1	0	CL0281
	204	229	204	229	PF09425.13	Jas_motif	1	26	26	53.39	1.8e-14	1.8e-18	1	0
MeJAZ9	190	221	188	221	PF06200.17	tify	3	34	34	61.52	3.5e-17	3.6e-21	1	0	CL0281
	308	332	308	333	PF09425.13	Jas_motif	1	25	26	49.78	2.4e-13	2.5e-17	1	0
MeJAZ10	104	124	97	125	PF09425.13	Jas_motif	5	25	26	35.61	6.5e-09	6.6e-13	1	0	CL0281
	29	60	29	61	PF06200.17	tify	1	33	34	44.48	7.5e-12	7.6e-16	1	0
MeJAZ11	109	129	101	130	PF09425.13	Jas_motif	5	25	26	30.72	2.2e-07	2.3e-11	1	0	CL0281
	34	66	34	66	PF06200.17	tify	1	34	34	50.96	7.1e-14	7.2e-18	1	0
MeJAZ12	200	231	198	231	PF06200.17	tify	3	34	34	57.5	6.4e-16	6.5e-20	1	0	CL0281
	337	361	337	362	PF09425.13	Jas_motif	1	25	26	47.96	9e-13	9.1e-17	1	0
MeJAZ13	159	183	159	184	PF09425.13	Jas_motif	1	25	26	46.12	3.4e-12	3.4e-16	1	0	CL0281
	64	96	64	96	PF06200.17	tify	2	34	34	54.68	4.9e-15	5e-19	1	0
MeJAZ14	123	156	123	156	PF06200.17	tify	1	34	34	63.98	6e-18	6.1e-22	1	0	CL0281
	223	250	223	250	PF09425.13	Jas_motif	1	26	26	49.72	2.5e-13	2.6e-17	1	0
MeJAZ15	118	138	115	139	PF09425.13	Jas_motif	5	25	26	35.41	7.6e-09	7.7e-13	1	0	CL0281
	38	70	38	70	PF06200.17	tify	1	34	34	50.19	1.2e-13	1.2e-17	1	0
MeJAZ16	198	229	196	229	PF06200.17	tify	3	34	34	60.04	1e-16	1e-20	1	0	CL0281
	335	359	335	360	PF09425.13	Jas_motif	1	25	26	48.93	4.5e-13	4.5e-17	1	0
MePPD1	152	180	150	180	PF06200.17	tify	6	34	34	56.66	1.2e-15	1.2e-19	1	0	CL0281
	249	266	249	271	PF09425.13	Jas_motif	1	18	26	25.35	1.1e-05	1.1e-09	1	0
MePPD2	150	178	146	178	PF06200.17	tify	6	34	34	57.16	8.1e-16	8.3e-20	1	0	CL0281
	248	269	248	271	PF09425.13	Jas_motif	1	22	26	28.91	8.1e-07	8.3e-11	1	0
MePPD3	182	199	182	201	PF09425.13	Jas_motif	1	18	26	23.23	4.9e-05	5e-09	1	0	CL0281
	84	113	83	113	PF06200.17	tify	5	34	34	61.42	3.8e-17	3.9e-21	1	0
MeZML1	135	176	135	178	PF06203.17	CCT	1	42	44	50.76	1.5e-13	3e-17	1	0	CL0281
	136	157	134	158	PF09425.13	Jas_motif	5	25	26	28.17	1.4e-06	2.8e-10	1	1	CL0281
	207	243	207	244	PF00320.30	GATA	1	35	36	50.25	1.5e-13	3e-17	1	0	CL0167
	70	101	68	101	PF06200.17	tify	3	34	34	39.8	2.2e-10	4.4e-14	1	0
MeZML2	138	160	135	161	PF09425.13	Jas_motif	4	25	26	26.91	3.4e-06	7e-10	1	1	CL0281
	138	180	138	181	PF06203.17	CCT	1	43	44	56.88	1.8e-15	3.6e-19	1	0	CL0281
	206	242	206	243	PF00320.30	GATA	1	35	36	51.92	4.4e-14	8.9e-18	1	0	CL0167
	74	104	73	104	PF06200.17	tify	4	34	34	45.36	4e-12	8.1e-16	1	0
MeZML3	139	180	139	182	PF06203.17	CCT	1	42	44	51.97	6.1e-14	1.2e-17	1	0	CL0281
	140	161	138	162	PF09425.13	Jas_motif	5	25	26	26.8	3.7e-06	7.5e-10	1	1	CL0281
	209	245	209	246	PF00320.30	GATA	1	35	36	48.82	4.1e-13	8.3e-17	1	0	CL0167
	70	102	69	102	PF06200.17	tify	2	34	34	37.43	1.2e-09	2.4e-13	1	0
MeZML4	143	166	141	167	PF09425.13	Jas_motif	3	25	26	34.01	2.1e-08	4.2e-12	1	1	CL0281
	144	186	144	187	PF06203.17	CCT	1	43	44	56.36	2.6e-15	5.3e-19	1	0	CL0281
	217	252	217	254	PF00320.30	GATA	1	34	36	53.28	1.6e-14	3.3e-18	1	0	CL0167
	83	111	80	111	PF06200.17	tify	6	34	34	44.63	6.7e-12	1.4e-15	1	0
MeZML5	141	163	138	164	PF09425.13	Jas_motif	4	25	26	29.39	5.8e-07	1.2e-10	1	1	CL0281
	141	183	141	184	PF06203.17	CCT	1	43	44	54.45	1e-14	2.1e-18	1	0	CL0281
	214	249	214	251	PF00320.30	GATA	1	34	36	52.93	2.1e-14	4.3e-18	1	0	CL0167
	82	110	79	110	PF06200.17	tify	6	34	34	44.58	7e-12	1.4e-15	1	0
MeZML6	136	158	133	159	PF09425.13	Jas_motif	4	25	26	26.93	3.4e-06	6.9e-10	1	1	CL0281
	136	178	136	179	PF06203.17	CCT	1	43	44	54.21	1.2e-14	2.5e-18	1	0	CL0281
	204	240	204	241	PF00320.30	GATA	1	35	36	51.94	4.3e-14	8.8e-18	1	0	CL0167
	74	104	73	104	PF06200.17	tify	4	34	34	45.39	3.9e-12	7.9e-16	1	0
MeZML7	135	176	135	178	PF06203.17	CCT	1	42	44	51.05	1.2e-13	2.4e-17	1	0	CL0281
	136	157	134	158	PF09425.13	Jas_motif	5	25	26	28.42	1.2e-06	2.3e-10	1	1	CL0281
	207	243	207	244	PF00320.30	GATA	1	35	36	49.22	3.1e-13	6.2e-17	1	0	CL0167
	70	101	68	101	PF06200.17	tify	3	34	34	40.07	1.8e-10	3.7e-14	1	0
MeTIFY1	309	332	308	332	PF06200.17	tify	2	25	34	38.74	4.6e-10	2.4e-14	1	0	—
MeTIFY2	312	344	311	344	PF06200.17	tify	2	34	34	53.51	1.1e-14	5.8e-19	1	0	—

## Sheet: Table S5
Table S5. List of the TIFY family sequences in cassava.
TIFY name	Gene ID	TIFY CDS	TIFY protein sequence	TIFY genomic sequence
MeJAZ1	Manes.03G042500	ATGGCTGGTTCGCCGGAATTCGTTGAGTTTGCTGGACTTAGGGCAGCGAGGTTCCCGGAGAAGTCCGGTTTCTCTCAGACTTGTAGTCTGTTGAGTCAGTACATAAAGGAGAATGGCAGTTTTGGAGATCTCAGTCTTGGGATGACATGCAGCAGTGAAGGAAATGGGACGCCGGAGGTGCGCCAGGCGGCAACAACAATGAATTTGTTTCCAGTAAATGAGAGAATAGATTATGTTTCTAGCAGAAACAGGGCTACTCCTCGGACAAATTTTATATCCATGGATTTGTTCCCTCAACAAGCTGGTTTTGCTCCCTCTGTTCCCAAGGAAGATGTGCAAAAGAGCCTAGACTCGAGTTTTAGCAAGGCTGCGTCTCCAGAGCCTCAAAATGCTCAAATG…	MAGSPEFVEFAGLRAARFPEKSGFSQTCSLLSQYIKENGSFGDLSLGMTCSSEGNGTPEVRQAATTMNLFPVNERIDYVSSRNRATPRTNFISMDLFPQQAGFAPSVPKEDVQKSLDSSFSKAASPEPQNAQMTIFYGGQVIVFNDFPADKAKEVMLLAGKGSSQSLTGFLPSVPVKSHPVFAPNVAKTPESISSVPPSSNAVPNFGNNLIQDRMQPPTQAIASDLPIARRASLHRFLEKRKDRITARAPYQTIGFSGSPSKPAASKWLLNLGQ	AAAAGCCCCATATATTCCTCGTGCTTCTTTAACCCTATTATTCAACTCAGCCAGAAAAGAAAGCTTCCCTCTCCCTCCTCCGTCTAAGCGTGAGCGAATGCAGGTGTAGAGATCATCAACTCCGACGCGATTGGATTACGATAAGTTAACTAGTCTTCTGGATCTGTTTGTTTGAGATTTTTTTTTTTCGACGAAGAATTATGGCTGGTTCGCCGGAATTCGTTGAGTTTGCTGGACTTAGGGCAGCGAGGTTCCCGGAGAAGTCCGGTTTCTCTCAGACTTGTAGTCTGTTGAGTCAGTACATAAAGGAGAATGGCAGTTTTGGAGATCTCAGTCTTGGGATGACATGCAGCAGTGAAGGAAATGGTGAGTATCGGATTTTTTTGGATGCGAATTTCT…
MeJAZ2	Manes.03G055200	ATGGAGGGTGATTCTGATTCCTTCAAGGAAGTGAAGCCCAAAGCTGGGGAGGAGCAACCTGCTATTAATGGTGCTGATGAGAACATGGGATCTCCCATGGAGACCAATAGCTCCAAGCCTGAGTCAATGGCAACTTCTGGACCAAATGCTACCATCCCTACTTCAGATCAGCTTACTATCTTCTATGGTGGAAGCGTTCTTGTATTTGATGCAATTCCTGCAGCAAAGGTTCGTGAAATTATGCTTATTGCTGCAGCAGCTGGTAAACCTGCTGACATGAAGAAGGCTGTCTCTGTCTCTCCAGCTGGTGGTACACCAGTTCTTACCAGGTCTCCTTCGCTGCAAAGCACTACAAGTGCTTTGCCTTCACCACAACCACAAGCAAAGCTTCATCCAGTT…	MEGDSDSFKEVKPKAGEEQPAINGADENMGSPMETNSSKPESMATSGPNATIPTSDQLTIFYGGSVLVFDAIPAAKVREIMLIAAAAGKPADMKKAVSVSPAGGTPVLTRSPSLQSTTSALPSPQPQAKLHPVHQGSFLCKLQAELPIARRHSLQRFFEKRRDRLYSKSPYLSSAERKMAETIKPDFSAQVSPDAGCFGKPLAPEKETLPKVAASVA	AAGAGTCGGTCAGGTAAAACCGGTTCATTTGTCCTACAATTCTCAGTTTTTCTGTTGAGCAAGAGGAAGAGAGGCAAGAAATTTTGTGGGTTTTACTGTCTGATCTGGATCAAAATGGAGGGTGATTCTGATTCCTTCAAGGAAGTGAAGCCCAAAGCTGGGGAGGAGCAACCTGCTATTAATGGTGCTGATGAGAACATGGGATCTCCCATGGAGACCAATAGCTCCAAGTAAGACTCTATGTTTTTCTTTTTAGGTTATTTAGCTTAATGGAGAGAAAGGGGATTTGGGGATGGGATCTGTTGTGTTTGTGCAAAAGCAGAGGAGAAGATTGAATGTAGATTGGAACCTGGTCTGAGGTTAAATAAGAAAATTAAAGCAAACTAGTGAAATAAGGGA…
MeJAZ3	Manes.04G147900	ATGGCAAACTTGGTTCAGAAATCCGGCAAGGCAGCATCACCGGAGAAATCAAACTTTGCTCAGACATGCAACCGTTTTAGCCAATATTTGAAAGAAAGAGGAAGTTTTGGAGATCTTAGCCTGGGAATAAATGGAAATCTTGAAGCTAAAGCTCCTGAAGCATCTAGACCACCTGCAACAACACTGAATCTACTGTCAAACATTGAAAATTCAGCTGAAGTTTCATCACAAAAAGCTATGCCATTTCCAAACATAAAACCCACGGATTACTTCTCTCAATCTGTGGGTTTTGCTTCTACAAATCCCATCCAAGACTCCATTGCTAAATCTGCAGGTTTGAGGAAATCCTCCAGAGCAGCAGATCCTGGGACTGCCCAACTGACCATATTTTACGCAGGC…	MANLVQKSGKAASPEKSNFAQTCNRFSQYLKERGSFGDLSLGINGNLEAKAPEASRPPATTLNLLSNIENSAEVSSQKAMPFPNIKPTDYFSQSVGFASTNPIQDSIAKSAGLRKSSRAADPGTAQLTIFYAGQVIAYDDFPADKAKEIMALASKASANTQNGFSTAASTSAIDNIKSTLQLQPQAIGSGLPIVTRVSLHRFFEKRKERVASKAPYQLNNPSSSPPARPRRDEQIDLEDQSWQQLELKL	AATCCCAACTTCTCATATATATTCTTCCCAATCCTACCTCCTTCCGCCCAGCAGCCACCATAATTTTCTTCATCAAGAATAAAACTTCACAAAAACAAACGGCTTGATTCTCAAGAAAACCGTGTTGCTGAACGTTTTGAACCTCATGGCAAACTTGGTTCAGAAATCCGGCAAGGCAGCATCACCGGAGAAATCAAACTTTGCTCAGACATGCAACCGTTTTAGCCAATATTTGAAAGAAAGAGGAAGTTTTGGAGATCTTAGCCTGGGAATAAATGGAAATCTTGAAGCTAAAGGTAAATATTAAATCCCTTTTTTCCTCCTTAATTACATAATTATTTCTTCATTTCTGTTCCTTGTGTTTCTTGGCTTCTTATGGTGTGGAATAATATTTCAGCT…
MeJAZ4	Manes.06G004000	ATGATGGAGAGGGATTTTCTTGGTCTGGGCTCGAAAAACTTTCCGGTTACTGTGAAAGAGGAGGTCACAGTCACTGATGGCTATAAGGAATCGGTTCCAATGAGAGGTTCAGCAATGCAGTGGTCTTTCTCAAACAAGGTTTCTGCCATTCCTCAAATTTTGTCATTTAAGTCTGGTGTGGAAGAAAAGCCAAGAAAGCCTACTCATGATCGCATAGCTTCCTCTGGTTTTATTCCCATTTCAACTGCTGATGCTTTTGATTCTAACCACAAGTCATATAATAGCATGGTTCAGAAAAATATGACCCTTGATAAACAAGGCGCAAGACAATACACAATGACTGCATATGCTGCGCAACATGTTGATTCGCACCTGTTCCATCACTCCCAGCAAACGAGG…	MMERDFLGLGSKNFPVTVKEEVTVTDGYKESVPMRGSAMQWSFSNKVSAIPQILSFKSGVEEKPRKPTHDRIASSGFIPISTADAFDSNHKSYNSMVQKNMTLDKQGARQYTMTAYAAQHVDSHLFHHSQQTRIFPVTNHQNQTITISLSNPVLQSHLASVGNNVGGNSMNSQSLAGVPSISPVSLHPTPSSIVGTTNLRNGPKPSGTPAQLTIFYGGSVCVYDDVSPEKAQAIMLLAGNGSSITQNKAVSSAQVQAPIRSPSAGDGFIVNRIYASAPCLGLPSPISVTSSSANDLATGKPVGALVSANNHIESTKTVSSVGSGSATMIPAVAVPQARKASLARFLEKRKERVMNTLPYNVSKKSPDCSSATQCDSVSYSINSLSSPSHQ	TTCCTTCCCTTTTTAGTTTTCATTTTCAACAAAACAAACGTGGTCTCTCTCTCTCTCTCTCGTTTGCTTTCTCTGCTTAAAGAAGTAAGAATCATCTTTCTTTGAGGTCTGTTGAAAAGCTCCTAGGCAAGAGGAAACTCATACGAGAAAAGCAGAGAAAAAAGAGAAAAACTGGGCTCTCGCTTTCGAGTAAGATTATTAGCTTTGTGGGTTTTCGTTCACTCACATGATGGAGAGGGATTTTCTTGGTCTGGGCTCGAAAAACTTTCCGGTTACTGTGAAAGAGGAGGTCACAGTCACTGATGGCTATAAGGAATCGGGTATGCTTTTGTATTTTAATTTCTTCTTATACTTTTTGTTCTTTGTTCTGTTTGTTGCTTTGACAGTTTTGTATTACTG…
MeJAZ5	Manes.07G023500	ATGGATTTCTTGGTGAAGAAAGAACAGCCGATTGGTTTAGAAGATGAGAATGATAATGATCCATTGGTGATGGCTTCTTGTTTGGATTTCAAAGTAGCGGCCTTGAAGAAGAAGAAGAAGCAGAAGAAAATGTGTTTTGATCATCATGAGTTAACAGACGACAGGTCGTCTCAAATACTCTCCATGTTTAGGAAATATCTTTACTCCAAAACTCAAAACGATGTCGTTGGAAAAACCAATATGGAAGAATCAGAAGCCATCAAGCTGAAGCATGCAGCTAGATTTACGCCACGCCAAGCTTCTCTCCTTGAACAGAAGTTGCTTCGTGGAATTAGGAAGGAAGAAAAGCAATCAGAATTTGATGGCAAGTCTTCAGCGGCACAACTCACAATATTCTAC…	MDFLVKKEQPIGLEDENDNDPLVMASCLDFKVAALKKKKKQKKMCFDHHELTDDRSSQILSMFRKYLYSKTQNDVVGKTNMEESEAIKLKHAARFTPRQASLLEQKLLRGIRKEEKQSEFDGKSSAAQLTIFYAGTINVYNNVPAHKAQAIMLLAGESSTSKPASVELPAKMETNGISSSVNLTSVCKLQADLPIARKLSLQHFLEKRRCRIISKSPYSSPATPRAEENSEETKPRADGDDSNAVHGSISLSPFPSRLGYFFPVSANKDL	CGTAAAATCCCAAGTCCTTACTCTGTCGATCGATCTCAATAATCTCCATTTATTATATATACACACAGAAAAACTCATTAATTTTAGATTTGTTTCTGAAAATTCACTTGCTAACAACTAGCAATTTCAGGTATATCCACACAAATCCCTCACTGTCTGCTAATCTTGAATTTTCTTCTTTTTAATTTCAATTCTATATATATATAGTTTTTGATTGAAAGTTTCTTCAGAAACCCTACAAGAATGGATTTCTTGGTGAAGAAAGAACAGCCGATTGGTTTAGAAGATGAGAATGATAATGATCCATTGGTGATGGCTTCTTGTTTGGATTTCAAAGTAGCGGCCTTGAAGAAGAAGAAGAAGCAGAAGAAAATGTGTTTTGATCATCATGAGTTAACA…
MeJAZ6	Manes.08G102800	ATGTCCAGAGCAACAGTCGAGCTCGATTTCTTTGGCATGGAGAAACAGATCTCCGCTGAGCCTCGCTTCCCTAAGTTCCTTAATCGCCAGAGGAGCTTTCGAGATATCCAGAGCGCCATTTCAAAAATCAATCCTCAGGTTCTCAAGTCTGTCATTGCCTCTGGTTCTGCAAATCTCCAGAATCCTGAAAATGGCTATCAGTGCGATTCAAAAAAGTTATTTTCGGTGCCTTCCACTCCTAAAGAAGAACAGACTCCATTTCCCCATTTACCGGTCTATTCTCCTCTTCAGAGGCCTGCTGTGGAGAATCCTACTGAAACTGCTCCTTTGACGATTTTCTACAATGGAACCGTGGCGGTTTTCGATGTTCCTCGAGATACGGCGGAGTCTATTTTGAAA…	MSRATVELDFFGMEKQISAEPRFPKFLNRQRSFRDIQSAISKINPQVLKSVIASGSANLQNPENGYQCDSKKLFSVPSTPKEEQTPFPHLPVYSPLQRPAVENPTETAPLTIFYNGTVAVFDVPRDTAESILKLVENGFSKSVESTNQQEVLKNTLDGADLPIARRKSLQRFLEKRKERLTSLSPYACPPDCR	TTTATTAAGGTCCCTCCACTTTCTCTTCTCCTCTCGCCTCTGCATTCAAGTTATCTGCCTTCACGACATTCTCATTTTAATCATAAGCAACTTAAGATGTCCAGAGCAACAGTCGAGCTCGATTTCTTTGGCATGGAGAAACAGATCTCCGCTGAGCCTCGCTTCCCTAAGTTCCTTAATCGCCAGAGGAGCTTTCGAGGTCAGTTTTTCTTCTTCTTCTTCTTCTTCTTCTTCTTCTTCATGTTTTTTGTGCAGTCCTGACGATTTTTTTTTGGCAGATATCCAGAGCGCCATTTCAAAAATCAATCCTCAGGTTCTCAAGTCTGTCATTGCCTCTGGTTCTGCAAATCTCCAGAATCCTGAAAATGGCTATCAGTGCGATTCAAAAAAGTTATTTTC…
MeJAZ7	Manes.09G186200	ATGTCCAGAGCAACTGTCGAGCTCGATTTCTTTGGCATGGAGAAACAGATCTCTGCTAACTCTCGTTTCCCTAAAATCCTTCCTCGCCAAAGGAGCTTTCGAGATATTCAGAGCGCCATTTCAAAAATCAATCCTGAGCTTCTCAAGTCTGTGATTGCCTCTGGTTCTGCCAATCAGCGGACTCCTGAAAATGGCTATCAGTTGGATTCAATAAAGTTGTGTTCGGTGCCTTCTACCCCTAAACAAGAACTCACTCCATTTCGCCCTTTACCTGTCTATTCTCCTCTTCAAAGGCCTGCCTTCGAGAGTACTCCGGAAACGGCTCCTTTGACGATCTTCTACAACGGAACCGTTGCGGTTTTCGATGTTCCTCGAGATAAGGCGGAAACCATTTTGAAG…	MSRATVELDFFGMEKQISANSRFPKILPRQRSFRDIQSAISKINPELLKSVIASGSANQRTPENGYQLDSIKLCSVPSTPKQELTPFRPLPVYSPLQRPAFESTPETAPLTIFYNGTVAVFDVPRDKAETILKLAENGLSKSVESTNEKQLLHTLDGDLPIARRKSLQRFLEKRKERLTLAFPHASSSICRLLNKAEVGR	CAGCCCCCCCCCCCTTTTTAAAGGTGGCTTCACTTTCTCTTCTACTCCCGACTCCCGCCTTTGCATTTAAGTTCTCTACCTTCACAAATCACAACATTATCGATTTCATCAGTAATAAAAAATTAAGATGTCCAGAGCAACTGTCGAGCTCGATTTCTTTGGCATGGAGAAACAGATCTCTGCTAACTCTCGTTTCCCTAAAATCCTTCCTCGCCAAAGGAGCTTTCGAGGTCTGTTTTTCGTCTTTCTTCTTCTTTCTTCTTCTTCATCTTCTTCTTTGCGTTTCATGTTTGTTTTTGTTCTTTCCTTACCATTTTTCTTTTCTACTTTTTTTTCTTCTTGTTTTATCGCAGATATTCAGAGCGCCATTTCAAAAATCAATCCTGAGCTTCTCAAGTC…
MeJAZ8	Manes.11G016700	ATGGCGAATTTGCCCCAGAAATCCTCCGGCAACGGCAAGTCGGTACCGGAGAAATCAAACTTTGCTCAGACATGCAATCTTTTGAGCCAGTATATGAAGGAAAGAGTAAGCTTTGGAGATCTTAGCCTCGGAATTAATGGAAAGCCTGAATCTAAAGGTCCTGAAGCATCCAGACCACCAGCAACAACACTGAATCTCCTGACCAACATCGAAAATCCAGCTGAGACTTCAAGACAAAACTCTGTCCCATCTGCAAATATAAAACCCAAGGAATTTTTCCCACAATTTGTAGCTTCTGCTTCTCCAAATCCCACTGAAGATGACTCCACTGTTAACAAGCCTGCTGATTTGAGGAAATCATCGAAAGCAGATCCTGGAACTGCCCAGCTGACAATATTT…	MANLPQKSSGNGKSVPEKSNFAQTCNLLSQYMKERVSFGDLSLGINGKPESKGPEASRPPATTLNLLTNIENPAETSRQNSVPSANIKPKEFFPQFVASASPNPTEDDSTVNKPADLRKSSKADPGTAQLTIFYAGQVIVYEDFAADKAKEIMALASKGSSSSKNGCTVSTSAVDKSNNFTDPSNNNAPRGIQLHPQANGSDLPIARRASLHRFLEKRKDRVASKAPYQVNNPSSPARPTPDDESNPFIIDLEAQSSKQFDLNL	TTCTTCTACAGCTCATGGGCTAATCAGGTTCAAAGAACATGATAAAAGAAACCCTACTCCTCATATATACCCAGCAGCCTCTCGCTTTTCAGTTTCAATAATATTTCACTCTGAAATCAAATTCCTGATCAACAAAACTTGTACTTCTCAATTCTCTCAATAGTCGAGAGATAAATCATCTTTAGCCTTATGGCGAATTTGCCCCAGAAATCCTCCGGCAACGGCAAGTCGGTACCGGAGAAATCAAACTTTGCTCAGACATGCAATCTTTTGAGCCAGTATATGAAGGAAAGAGTAAGCTTTGGAGATCTTAGCCTCGGAATTAATGGAAAGCCTGAATCTAAAGGTACATAATTAATTCCTTCTCCTGCTCATCTCATATATATAATTCCTTTATTT…
MeJAZ9	Manes.14G172400	ATGGAGAGAGATTTTCTGGGTCTTGGTTTGAAAAATGTCCAGGTTACGGTGAAAAAGGAGGTAGCTGATGGCTATAAGGATTCGGTTCCAATGAGAGGTTCAACAATGCAGTTGTCTTTCTCAAACAAGGTTTCTGCCATTCCTCAGTTTTTGTCCTTTAAGTCTGGTGTGGAAGAAAAGCCAAGAAAGACGACTCATGATCACATATCCTCTGGTTTTAGTCCCATTTCTACTGCCGATGCTTTTGATTCTAATCAGAACCCATATTCTTGCATGATTCATAAGAATATGATTCCTGATAAACAAGGAGCAAAACATTATGCAGTGCAACACTTTGATGCATATCCAGTTCATCGCCCCCAGCAAATGAGGATATTCCCAGTTTCCAACCATAGTCAA…	MERDFLGLGLKNVQVTVKKEVADGYKDSVPMRGSTMQLSFSNKVSAIPQFLSFKSGVEEKPRKTTHDHISSGFSPISTADAFDSNQNPYSCMIHKNMIPDKQGAKHYAVQHFDAYPVHRPQQMRIFPVSNHSQTITACHFASSGQNVGDNSLNSQSVGRVPIISSVSVHPTPSSIVRTTELRNVSKSSVATAQLTIFYAGSVCVYDDICPEKAQAIMLLAGHGSSVTQDKTVSPAQVQAPIQGPSAYVGNKTHTCSGLPSPIAVTSTSNNELATVKLMGPLASTNNSTEPPKTVGSSSATLIPTVAAPQARKASLARFLEKRKERVMNASPYNAS	AACCAGTCGGTCTTGGCTTGCCTCTCTCGATCTCTCTCTTCAACTCTTCTTTGCTTTCTCTGCTTAAAGAAGCAAGCATCGTCTCTGTTTTCGGTTTGTTGAAAAGCTTTTGGGTAAGAGTAAACTCACTCGAGAGAAAAAAAAAAGGGTTTTGTTTTCCAGTAATATTATTTTCTTCGTGGGTTTGATCATGGAGAGAGATTTTCTGGGTCTTGGTTTGAAAAATGTCCAGGTTACGGTGAAAAAGGAGGTAGCTGATGGCTATAAGGATTCGGGTATGCTTTTCTTCTCCTTCTTCTCTGTTTCTGTTTTGAAACTCTGTTGAACTTGTTTTGGTTTGTTTGGCTGTTGAGAAAGTTCGAGATAAGGAAAGACAAAATATTTAACTTTCCACTCTAC…
MeJAZ10	Manes.15G122700	ATGAGGAGGAACTGCAACCTTGAACTCCGCCTATTCCCCACTTCCGATCAAGACCACCACCGCATAACGGAGGAATATTCAAAAGAACAGCAGCAACAGCAGATAACAATATTCTACAATGGAAATGTTTGCGCTGGAGATGTTACGGAGCAACAGGCGAGAGCTATTCTGATGTTGGCAAGACAAGAAACGGAAGCTAAAATGAGAATAAACTCAAGTGGATCTTCGTCTTCCTCGTCGACCTCGTCATCAGAACAAATTGTATCGCCAACAGTGGCATCTCCTCCGCCGGTTTATAGCCCCAACATGAAGATATCACTGCAAAGGTTCCTTGAGAAGAGAAATCATCGGATTCAAACAACTTACCCCTACAACATTAACCGACGGCCTCATATGTGC…	MRRNCNLELRLFPTSDQDHHRITEEYSKEQQQQQITIFYNGNVCAGDVTEQQARAILMLARQETEAKMRINSSGSSSSSSTSSSEQIVSPTVASPPPVYSPNMKISLQRFLEKRNHRIQTTYPYNINRRPHMCRVDH	TTACTTCCCCTTCCAAATTCCAACTTCTCGGATCAACCAAAGATGAGGAGGAACTGCAACCTTGAACTCCGCCTATTCCCCACTTCCGATCAAGACCACCACCGCATAACGGAGGAATATTCAAAAGAACAGCAGCAACAGCAGATAACAATATTCTACAATGGAAATGTTTGCGCTGGAGATGTTACGGAGCAACAGGCGAGAGCTATTCTGATGTTGGCAAGACAAGAAACGGAAGCTAAAATGAGAATAAACTCAAGTGGATCTTCGTCTTCCTCGTCGACCTCGTCATCAGAACAAATTGTATCGCCAACAGTGGCATCTCCTCCGCCGGTTTATAGCCCCAACATGAAGATATCACTGCAAAGGTTCCTTGAGAAGAGAAATCATCGGATTCAA…
MeJAZ11	Manes.15G122900	ATGAGACGAAACTGCAACCTTGAACTCCGCCTTTTTCCCTTCTCCGATCCCGACTACCATCCGCCGATACTGGAGAAGGAGAGTAAAAATGAGCAAAGCCCACAGCAAAATCAACAGCTTACTATTTTCTACAATGGAACGGTTTGCGCTTGTGATGTTACGGAGCTCCAAGCGAGAGCCATTCTATTCCTAGCAAGTAGAGAAATGGAAGAAAAACAGAGAACCCCAACCCCAACTCCGACGCCGACTCCAAGTGGGTCAGAAGTAGCTTCTCCAAATTTGCCATCTCAACTGTGTAGCCCTATAGCTGCTGGTCTTTCGATGAAGAGATCCATCCAACGTTTCCTCCAGAAGAGGAAGCATAGGGTCCAAGAAAATTCTCCTTACAATCATTAA	MRRNCNLELRLFPFSDPDYHPPILEKESKNEQSPQQNQQLTIFYNGTVCACDVTELQARAILFLASREMEEKQRTPTPTPTPTPSGSEVASPNLPSQLCSPIAAGLSMKRSIQRFLQKRKHRVQENSPYNH	GCTTTCATTTCTTTCTATGCTTAATTAGATATGTGTTTGGATTCCTCCGCTCCCCTTTCTCTTTCTTCTTCTCTTCGCCTTTCTTCTGTCCATTCTTGAATTCATTCTTTCATTTCTGATTTGTCAACACTAACAACCATGAGACGAAACTGCAACCTTGAACTCCGCCTTTTTCCCTTCTCCGATCCCGACTACCATCCGCCGATACTGTAAGTTAAAGTTCTCTTTCCCTCTTTGTGATTGTATATATATATATATATATGCATCAACTTGTTTAATTATTGATGATGATGGATTTTGATGATGTTTTGAAGGGAGAAGGAGAGTAAAAATGAGCAAAGCCCACAGCAAAATCAACAGCTTACTATTTTCTACAATGGAACGGTTTGCGCTTGTGAT…
MeJAZ12	Manes.15G133000	ATGGAGAGAGACTTTATGGGTCTGAACTTAAAAGAACCATTGCCTCTTGTTAAGGAAGAGGTTAATTCTGATGGATACAAAGAGATAGGATTTAATAAGGGTTCAGGGATACACTGGCCTTTCTCCAACAAGGTCTCTGCCCTTCCTCATTTGAATTCTTTCAAGGCTTCCCAAGAAGATAAGGCCAAAAGGCTTGTATCTGATTCCTCATTGTCTCCTGGATTCTTGTCCATCTCAACTGCTGATGCATTTGATTCTAAGCAAAAGCAATTTATGGCTGAAACCCAGAAATCGTTCAATCACGACAGGCAAAGTGGGAGTCATTTTACTTTGACTGCTTATCCTGTGCAACATGGTGTGCATTCTATGCATCATCCTCATGACATGAAGATGTTTCCA…	MERDFMGLNLKEPLPLVKEEVNSDGYKEIGFNKGSGIHWPFSNKVSALPHLNSFKASQEDKAKRLVSDSSLSPGFLSISTADAFDSKQKQFMAETQKSFNHDRQSGSHFTLTAYPVQHGVHSMHHPHDMKMFPFSNYASSISMSNPFFKNYQATSGQNIAGATLNPQLLGGIPVVSPQTNLPTVGFVTGMTESCVKASRSPPQMTIFYAGTVNVYDDVSPEKVQAIMFLAGNGSSISSNMAQSNIQVQTPSSKPIATDVSPVNLSVTIPPCSRLSSPVSFSSQTGAQSGSGSTSTEEIMAAKNTGVATTPVSKLETPKISSAMGTVTATSMMPSAVPQARKASLARFLEKRKERMMISAPYNLGKKSAESAIQNPVMVSSATSAVGTCYLPASKEGNDN…	GAAAGCCTTTTCTTTTTCTTTTTCTAATTTTTCAAAATTAACGGTCAAGATCTTATAAGCTCATCTTCTCGTACCAAAGTTCACAAATCTCTCTCTCTCTCTTCTCACTTTTGATGTAGTTGGAAGCTTTCGTTTTGGGTTTTCTCTCTCTACTTTCTCTCTATAAACTGAGGTTTGGTGGGATTGATCTGTAAATTTAATGGTTGTCGGACTAGTTTGGTGAGGTGGGTTTTGGTTGAATTTGTGTCTCGTTTTTTTGAGAGGTGACAGAGCTAAAAATGGAGAGAGACTTTATGGGTCTGAACTTAAAAGAACCATTGCCTCTTGTTAAGGAAGAGGTTAATTCTGATGGATACAAAGAGATAGGTATGTGTTTTGTTCTCTTGTTTTCCTTTTTTA…
MeJAZ13	Manes.16G088300	ATGGAGGCTGAAGCTGATTCCTACAATGAAGTGAAGCCCAAAGCTGGGGATTGCCAAGAGGTTTCCATTAATAAGAGTGTCATGGATGCTGCTACCGGCGCTGATGGGGACACTGGATCTCTCCTTCTTCTCCGAACCAACAGCTCCAGGCCTACTGCTATGGCAACATCTGGACCAAATGCTGCAGTCCCTGCCTCAGATCAACTTACCATCTTCTATGGTGGAAGTGTTCTTGTATTTGATGCAATTCCTGCAGAAACGGCTCGTGAAATTATGCTTATTGCAGCCGCAGCAGCAGCTGCTGTTAAACCTGCTGAGGTGAAGAAGACTGTTTCTGGCTCTCCAGCTGGTGGAACGCCAGTTCTTACCAGGTCTCCTTCACTACAAAGTGCTACAAGT…	MEAEADSYNEVKPKAGDCQEVSINKSVMDAATGADGDTGSLLLLRTNSSRPTAMATSGPNAAVPASDQLTIFYGGSVLVFDAIPAETAREIMLIAAAAAAAVKPAEVKKTVSGSPAGGTPVLTRSPSLQSATSALASPRAQPYPVHQGSSLCKLQAELPIARRHSLQRFFEKRRDRLCSKSPYPTPPATKMAETTKPDFSAEVSPDAGCLGKPLAPEKEIQPKVAANVA	TGACTCATACTTTATTACAGAAATATTGAGTTAGCCTGGCCGCTCCGCCATTAAAAGATTAAGAAATACTGAAAAGGTCAGGTCAAGCTGCTTCCTTTGTCATAAAATTCTCTGTTTTTTGTGTTTCCCAAGAAAAACAAAAGCAAGAAATTTGGTGGGTTATTGATCTCGATCTGGATCAAATGGAGGCTGAAGCTGATTCCTACAATGAAGTGAAGCCCAAAGCTGGGGATTGCCAAGAGGTTTCCATTAATAAGAGTGTCATGGATGCTGCTACCGGCGCTGATGGGGACACTGGATCTCTCCTTCTTCTCCGAACCAACAGCTCCAGGTAAGATTCTACGGCTTTTTTGTTTTAGGGTAGTTAGCTTAAAAGAGACGAAAAGGGGGACGGGGAGA…
MeJAZ14	Manes.16G093500	ATGGCTGGCTCGCCGGAATTCGTTGAGTTTGCTGCCCGGAAGGCGTCCAGTTTTTCGCAGACGTGTAGTCTGTTGAGTCAATACATCAAGGAGAAAGGTAGTCTTGGAGATCTCAGCCTTGGGATGCCATGCAGCGGTGAAGGAAATGGAAATGGCACACCAGAGTTGCGTCAGGCGTCAACAACCATGAATTTGTTTCCAATGAATGAGAAACAAGTTGATGTTTGCAGCAGAAACATGGCTACTGCTCGGACTAATGTTAGATCCATGGATTTGTTCCCTCAACAAGCTGGCTTTGCTCCTTCTGCTCCCAAGGAAGATGTGCAGAAGAGTCTTGACTCGAGTATCAACAAGGCTGCAACCCCAGAGCCTCAAACTGCTCCAATGACTATTTTCTAT…	MAGSPEFVEFAARKASSFSQTCSLLSQYIKEKGSLGDLSLGMPCSGEGNGNGTPELRQASTTMNLFPMNEKQVDVCSRNMATARTNVRSMDLFPQQAGFAPSAPKEDVQKSLDSSINKAATPEPQTAPMTIFYAGQVIVFNDFPADKAKEVMLLASKGSSQSLTGFPSDSVKSHPEGDPNVVKAPVESTNPVPPSSNAIPNFGNNLIQERVQPPSRSIGSDLPIARRASLHRFLEKRKDRITASARAPYQTVGLSASSSKPAESKSWLGLAGQSLQ	AACTTCTAACAAAAAGATAAGCCTCTCCTCTCTTTCTCTCTCTCCTCTTGCAGAGTCCAGGCACAGGGAGAACCAAGTCTATTGGATTTCGATTAGTTATCTAGCTTTTTGGATCTGTTTGCTTAAGATCTTCCTTTTTGCGAAGGAGAAATATGGCTGGCTCGCCGGAATTCGTTGAGTTTGCTGCCCGGAAGGCGTCCAGTTTTTCGCAGACGTGTAGTCTGTTGAGTCAATACATCAAGGAGAAAGGTAGTCTTGGAGATCTCAGCCTTGGGATGCCATGCAGCGGTGAAGGAAATGGAAATGGTGCGTATTTATTTGAATTCTGAATTTTTTGAGGAAAAAGATTTGGAGATGAAAAATTTTGGAAGGGAGAAAACTGCTAATCATTTCAGTCAT…
MeJAZ15	Manes.17G071600	ATGAACTGCAATCTCGAGCTCCGCCTCTTTCCCACCTCCGATGAAGACCACAGCCATCCTCAAACAGAGAGTTATTCAAACGATCAAGAACCACCGCAGCAGCAGCAGCAGCAGCAAAAGCCACAGAAGCTAACGATATTCTACAATGGAACAGTCTGTGTTTGCGATGCTACAGAGCTTCAGGCGAAAGCCATTCTGATGTTGGCTAGCCGAGAAATGGAGGATAATAAAATAAGAAAATTTTCAAGTGGACCTTCTTCATCTTCATCGTCGTCGGGAAAACCTGTATCGCCAATTCGGACATCACCTCCGCCGGTCTATAGCTCTAAAAACAATACTGCCTTGTCGATGAAGAGATCACTCCAAAGGTTCCTTCAAAAGAGAAATAATCGGATGCAA…	MNCNLELRLFPTSDEDHSHPQTESYSNDQEPPQQQQQQQKPQKLTIFYNGTVCVCDATELQAKAILMLASREMEDNKIRKFSSGPSSSSSSSGKPVSPIRTSPPPVYSSKNNTALSMKRSLQRFLQKRNNRMQATYPYNMNRRPQACRLNLH	TTAAAAACAAAAACACCGTCATATCAGCTACAACAAGAAAATAAAATTAAAAAAAGGAAAAATATTACGCTCACAATTAAAGCACAAAAATCGCTATTCAAATAGACAAAACTGAAAACATGTATCCATGTCGGCTATATTTAACATACATATCACGTGCGTTAATTAAAAAAGGCCCAAAAGTAGTTGAAAAATATCAGTTGAAAGAAAAGCAGCGCTGGCTTTTTCAGGGTTCCTGCCTCTGCTCCTACCGCCGTTTCAAAACTTATTAAAAACAGCATTTTCCACGTGAAAATAAATAAATATATATATATATTAAAAACCAAATGTGTATGTGTTCATCGTTTACTAGTTGTCAATGAGCCGATATCTGTGGCCCCCACTTCACCGCTACCTGCC…
MeJAZ16	Manes.17G082100	ATGGAGAGAGATTTTATGGGTCTGAACTCAAAGGAATCATCGGCGGTGGTTAAGGAAGAGGTTAATTCTGATGGGTACAAAGAGATTGGATTTAGCAAGGGTTCAGGGGTACACTGGCCCTTCTCCAACAAGATCTCTGCCCTTCCTCATTTGAACTCTGTCAAGGTTGCTCAAGAAGATAAGATTGAAAGGGTTTTAACTGATTCCTCTGTATCTCCTGGATTTTTATCCATCTCAACTGCAGATTCATTTGATCATAACCAGAAACAGTCTATGGCTGAAACCCCGACATCGAATCACGATAGGCAAAGTGGGACTCATTTTACATTTACTGCTTATCCTGTGCAACATGATGTGCATTCTGTGCATCATCCTTATGACATGAAGATGTTTCCATTC…	MERDFMGLNSKESSAVVKEEVNSDGYKEIGFSKGSGVHWPFSNKISALPHLNSVKVAQEDKIERVLTDSSVSPGFLSISTADSFDHNQKQSMAETPTSNHDRQSGTHFTFTAYPVQHDVHSVHHPYDMKMFPFSNHATSISLSNPFFKNYYATSGKNTAGAVAKPEFGGFPVTTPQTIIPTIGSVSGMSESCVKASGSPAQLTIFYAGTVNVYDDISPEKAQAIMFMAGKSSSIACNMLQSKCQVQPPSSKSIATDVSPAKHGATTPPCSRLSSPLSVSSQTGAQSGSGSTSTEEIVATKTTEVATTPVSKLDTQKLTSAIGSVAATTLMPSAVPQARKASLARFLEKRKERAMSAAPYNLGKKSPESAIQNPME	CAGTTGGAAGCTTTCGTTTTGGTTTTTCTCTCTCCAGTTTTCTCTTCAAAAAACTGAAGCTCGGTAGAGAAGTGGAGAGATTGATCTATGAATATCTGATTTTGGACTAGTTTTTGAGGCGGGATTTAGTTGAATTTTTGTGTCTGTATTTGTTTTTTTTTTTGAGAGGTCGGGACGGTAAAATGGAGAGAGATTTTATGGGTCTGAACTCAAAGGAATCATCGGCGGTGGTTAAGGAAGAGGTTAATTCTGATGGGTACAAAGAGATTGGTATTCGTTTTCTTCTCTCGTTATCCTTTCTTTTTCTGCCTTGAATATTTTCTAATTTTGTTGTTTGGTTCATGCAATTTATGTTATTGTTCAGTCTCGTATGGAAATTTTGTAACTTTGCTTTCGAAA…
MePPD1	Manes.03G173500	ATGGACGCCGGCGTCACGTCATTCCGGTCGATACTCGAGAAACCCCTCACTCAGCTCACTGAAGAAGACATTTCTCAGCTCACTCGCGAGGATTGCCGCAAATACCTCAAGGAAAAAGGAATGCGGAGACCTTCCTGGAACAAATCACAAGCGATCCAGCAAGTAATCTCCCTCAAAGCTCTTCTTGAACCTAGTGAAGATTCCGGTGCCGGTGCTCTGAGAAAAATCTTGGTTTCCAAACCACCGGCTACTTCAAATTCGGTTCATTCAATTAAGGAGCCCAGTGATACCAATAACAACGCGATTTCGGGGTCTGCAGATGAGACTGCTCCGAGTCGGCAAAACGACTCTCCAAAAGCTACTCCTCCAGGGCCGTTAGATTCCCAACCGGGAGAGACC…	MDAGVTSFRSILEKPLTQLTEEDISQLTREDCRKYLKEKGMRRPSWNKSQAIQQVISLKALLEPSEDSGAGALRKILVSKPPATSNSVHSIKEPSDTNNNAISGSADETAPSRQNDSPKATPPGPLDSQPGETDNKDSATRCNDAADGLVGQMTIFYCGKVNVYDGIPPDKAQTIMHLAASRIQLPLDDPTRRPAFSFPCHFQIPSDKHGFIPPNAAVFQSTQTEKMKEYSHPCKDKANISLEPDVEGQANRRVSLQRYLEKKKDRGRFKGRKNTGPTSSSLEVYLNHHVRMHTSSEQTTRSSTSSPSQPGVPPTLCSSAEDQSKISCFSVDLNEDVREC	CCACTGCTCCACAGAACTACAACCGCCTCCTGCCTCTCTCTCGACCTCTACCGAACCTCTCTCTGTCTGGCAGCATGGACGCCGGCGTCACGTCATTCCGGTCGATACTCGAGAAACCCCTCACTCAGCTCACTGAAGAAGACATTTCTCAGCTCACTCGCGAGGATTGCCGCAAATACCTCAAGGAAAAAGGTCCTTCCCTTCTATTTATCCTTTTTCTCATTGCATTTTTTTGGGTTTTTTCCACTCCTCCCTCTTATTTTCCATATTTGTCCTTGGGTTTCCTTCATATTTTGCGGTGCCTGTAAATTTAGAGGCAGCTGACACGTGTCTCATTTTTTCTCCGGCTTTTGTTGGAATGTTCCCACAGGAATGCGGAGACCTTCCTGGAACAAATCA…
MePPD2	Manes.05G081400	ATGCAGCCGGGAGAGACCATTTCGCGGTCTCCTCTTGACAAACCCATTCACCAACTCACTGAAGATGACATTTCTCAGCTCACTCGCGAAGATTGCCGGAGATACCTAAAAGAAAAAGGCATGAGACGGCCTTCGTGGAACAAATCGCAGGCAGTCCAGCAGGTGATCTCTCTCAAAACGCTTCTCGAAGCGACACCGGATACTCGGAGAAAGCTCTACATTCCCCGTCCAGATAACCCTCATCGTGCCCCTGCAAATTCCTCTGTTTCAGTGAAGGAAACGAGCCCCGATAAACAGATCTCCGCATCGCCTGAGGAACCTGTTCCGTTTCCACGACATGATCCCACAAAGCATGATTCTCATGTAGATCTCCCGGCCCGTCTCGTTGCCACCGATAAT…	MQPGETISRSPLDKPIHQLTEDDISQLTREDCRRYLKEKGMRRPSWNKSQAVQQVISLKTLLEATPDTRRKLYIPRPDNPHRAPANSSVSVKETSPDKQISASPEEPVPFPRHDPTKHDSHVDLPARLVATDNDSVSPRIKTTANEPVGQMTIFYCGKVNIYDDVPRDKAQAIMQLAAYPLSFSLETSSDTVPALWPIPSRLESPGVKAAPISPMLIFPALQTGKVADNCELPREESNMSHEDSLEGPASRKASVQRYLEKRKDRFKNKRKVAMPSSASSDMNFNYREGDQFSNDQWNLSGAFSSPQPRPPQMPTQCSSVENTAKHSYLPADLNGRDIQEC	CCAAAAGCCCCCCTGCCCCGGTCTCTCGCCCGCTCCACTAAACTAAACTTCCTAAAGGTACACTCTTATTTACCGCAATATCAAGAAGTAGAAACTGTGAATCTCGCTAATCTTCTCAGCAGCAGAGAGCTACCTGAACTCGCTATCGCCGATTGCTGGACGGAACCTAACGCCATGCAGCCGGGAGAGACCATTTCGCGGTCTCCTCTTGACAAACCCATTCACCAACTCACTGAAGATGACATTTCTCAGCTCACTCGCGAAGATTGCCGGAGATACCTAAAAGAAAAAGGTCTCTAAGGATACTTTGTATAAATTTGTGCTTGTTTATGAATACCAAAGTATAGGTTGTGTCACTGCAGGCATGAGACGGCCTTCGTGGAACAAATCGCAGGCAGT…
MePPD3	Manes.15G032500	TCCGGCGCCGGTGCTCTCCGGAAAATCTTAGTTTCCAAACCACCGGCTACTTCAATTTCGATTGATTCAATTAAGGAACCGAGTGATACAAATAATATCGCAATTTCGGGGTCTGCAGATGAGACGGCTCCTTGCCGGCAAAATGATTCTCCAAAATCCCCTCCTCCGGGACCGTTGGATTGCCAAGCTGAAGAGGCAGATAATAAAGCCATTGCTTCCAGAAGTCCTGGTGCAACAGATGGATTGGTCAGGCAAATGACAATTTTCTATTGCGGCAAGGTGAATGTGTATGATGGAGTCCCACCTGATAAGGCCCAGGCAATCATGCATCTTGCAGCAAGTCCAATTCAGTCTCATCTGGATGATCCAATTCATAGACCTGCATTTTCATTTCCATGT…	SGAGALRKILVSKPPATSISIDSIKEPSDTNNIAISGSADETAPCRQNDSPKSPPPGPLDCQAEEADNKAIASRSPGATDGLVRQMTIFYCGKVNVYDGVPPDKAQAIMHLAASPIQSHLDDPIHRPAFSFPCHFQTPSDKHGFLHPNAAFVHATLTEKSTEYSHQCREKLNTTHDPDVEGQANRKVSLRRYLEKKKDRGKFKGRKSTGPTSSSLEFYVNHHVRTHTSNGQLARSSTSSPPLPGMPHALCSSADDQPKIASFSVDLNEDVQER	TCCGGCGCCGGTGCTCTCCGGAAAATCTTAGTTTCCAAACCACCGGTGAGTCCCAACTCCCTCGACTAATGGTGAACTGTTGCTGTTGTTCCTTTTCTTCTTCTTCTTTTATTTTTATTTTTTATTTTTTTAAGATTGCATATATAAGTACATCTAATTTATCTGTAGGCTACTTCAATTTCGATTGATTCAATTAAGGAACCGAGTGATACAAATAATATCGCAATTTCGGGGTCTGCAGATGAGACGGCTCCTTGCCGGCAAAATGATTCTCCAAAATCCCCTCCTCCGGGACCGTTGGATTGCCAAGCTGAAGAGGCAGATAATAAAGCCATTGCTTCCAGGTTAACCTGTGCTTTTCTATTTTGGCTCTTAACTTTTTTTCTTTTTGTCGTTTTT…
MeZML1	Manes.05G189500	ATGGCGGCAGCGAATCCACAGCCACTGCAGGCGCGTCCTTATGAAGAACACGTGCGAGCGCCGATACAGATCGAGGACGACGACGGCGGGGAGTACGAGGATGGTGACGCCATGGATGATGTTGATGAGCCGCTCATGAATTCCCGTGTTAACGTGGCGGAGCATCACGTCGGAGTTGGAGGTGGACCTGGTATGGTTATGGCGTCGAGGACTAGTGAACTAACTCTATCTTTTGAAGGGGAGGTTTATGTTTTTCCTGCTGTTACACCTGAGAAGGTGCAAGCAGTGCTCTTGCTTCTGGGTGGACGAGACATACCCACTGCTGTACCTACTATTGAAGTAACCTATGATCAAAATAGCAGGGGCATAGGTGACACCCCAAAGCACTCAAACCTTTCA…	MAAANPQPLQARPYEEHVRAPIQIEDDDGGEYEDGDAMDDVDEPLMNSRVNVAEHHVGVGGGPGMVMASRTSELTLSFEGEVYVFPAVTPEKVQAVLLLLGGRDIPTAVPTIEVTYDQNSRGIGDTPKHSNLSRRIASLVRFREKRKERCFDKKIRYTVRKEVAQRMHRKNGQFASLKESSCGSSWDSAQSCLQEGNPHPETAVRRCQHCGVSENNTPAMRRGPAGPRTLCNACGLMWANKGTLRDLSKGGRNVPIDQIEPEIPMDVKPSIMEGEFSGNQDEHGTPEDPCMSVTEGSNIPSVNPEEVVLQEPTEDLTRTLPMGVVHSSADDDEQEPLVELANPSDTELDIPPNFD	GAGGCAAGGCGAGCGACACATTTCCATAGCAGTCGGAAAATTTAAAAAATATATATATAAAAATTCCAAATTTAAGACTCTCGAAGGAAACAAGAGTGTAGCTTCTGCAAATCTTAGCTCTTTTAGGTTGCTTTGTCTCTCTTCCATTTTCGAAGCTTCTCAAGAGCTCATATAAAATTGGCAAATTCCAATTCGGTCTAGGGTTTCCAGTGCTTCAACATTTACTCACCATATCCAATGAAACAGACAGCTTCAAGCTTAGCTTAGGGTTTGTGTTCTCTGTGACTGAAGGTCGACCAGCGACGTTAAGGTTTTTTAAATGGCGGCAGCGAATCCACAGCCACTGCAGGCGCGTCCTTATGAAGAACACGTGCGAGCGCCGATACAGATCGAGGACGA…
MeZML2	Manes.05G189600	ATGTACGGTCATTCCCAACCTATGAACGTTCATCATCAGATCGCTGCCCCTGCCGCGGATGACGAAGACGGTGCTGCCGCTGACTCGATTGACCATCATCACATTCGTTATGAAGACGGTAATGCTACTGGTGTTGTCGTAGAGGATGTATCTCACGATTCTGTTTACGTTCCTAGCAGTGGTGCTGGCTCCGAACTTGTTGTTCACAGAGGCGATGTCTCCAGCCAACTCACATTGACGTTTCGCGGTCAAGTTTATGTATTCGATGCTGTTACCCCTGACAAGGTTCAAGCAGTGTTATTACTACTGGGTGGATGTGAACTAACTTCTGGTCCGCATGGTCTGGAAGTAGCAGCTCAAAACCAAAGGGGTGCGGTGGTGGAATATCCAGGACGTTGT…	MYGHSQPMNVHHQIAAPAADDEDGAAADSIDHHHIRYEDGNATGVVVEDVSHDSVYVPSSGAGSELVVHRGDVSSQLTLTFRGQVYVFDAVTPDKVQAVLLLLGGCELTSGPHGLEVAAQNQRGAVVEYPGRCTQPQRAASLNRFRQKRKERCFDKKVRYSVRQEVALRMQRNKGQFTSSKKSDGAYGWGGGQDSGQDDIQQETTCTHCGISSKSTPMMRRGPSGPRSLCNACGLFWANRGTLRDLSKKTQEQQHSVTPIEQGEAEANDSDSGNAMQTHNNLVTY	GCCAACCTCATTTCTTCCTCGTCTCCCCGCCCCCTTGTCTCTCTCGTTTTTCGCTTTTCACTCTTTTACTCTCTCTATCTCACTCAATTAGGGTTAGGGTTTTATACAATTCCCCCAAATTCACTTCTCTCCTCTTCTTTTCCCTCTATGTAATGCTTCTCAATCCTCAGTTTCACCCTCAGACTCGCCAATGTACGGTCATTCCCAACCTATGAACGTTCATCATCAGATCGCTGCCCCTGCCGCGGATGACGAAGACGGTGCTGCCGCTGACTCGATTGACCATCATCACATTCGTTATGAAGACGGTAATGCTACTGGTGTTGTCGTAGAGGATGTATCTCACGATTCTGTTTACGTTCCTAGCAGTGGTGCTGGCTCCGAACTTGTTGTTCACAG…
MeZML3	Manes.07G041200	ATGGAGAGGTTGAATGCGATTCCACTCAGAGAACCGCCTTGCGGTGGCGAGGAGGATGATCGGAGGCTGCTGCATATCGATGGTGGTGAGCTTGACGGTGGATTGGATGGAGGAGAGGAGGAGGAGGGCGTTATGAATGGAGTGGAAGAAGTACCGCAAATGAGTTCGATGGATTTTAAGAGTAGTAATGGCTGTATGGCTCAGTCCGCCAGGACTAGTGAGCTTACCATAGCTTTTGAAGGCGAAGTCTATGTTTTCCCTGCGGTTACGCCTCAAAAAGTGCAAGCAGTGTTATTACTTCTAGGAGGGACAGATACACCTGCTAGTGTTCCAAGTTCTGAATTTTTGCTGCAACAGAATGCTGGAGTATATAATAATGTAGGTGATGCTTCTCGAGGA…	MERLNAIPLREPPCGGEEDDRRLLHIDGGELDGGLDGGEEEEGVMNGVEEVPQMSSMDFKSSNGCMAQSARTSELTIAFEGEVYVFPAVTPQKVQAVLLLLGGTDTPASVPSSEFLLQQNAGVYNNVGDASRGSKLSRRIASLVRFREKRKERCFEKKIRYTCRKEVAQRMHRKNGQFASLKDCYSTDAGSNWEPNSGTPHSESASRRCQHCGISEKDTPAMRRGPAGPRTLCNACGLMWANKGTLRDLTKGGRHISFDQNELGTPDLKPSTMKQENPYANQDEEGSPEESKPVPLDSENSLRPNDQELLEADETLTDPLPMRVENSPVNLDDEDFQDTLDELGNVSSSEFEIPGNFDDQVVVF	AATTTTGGAGTAAATTTCAGAAAAAGAAAGTTCCAACCTTGATTTTTTGACAAATTGCAGAAACTCGGAGTCTTGTCTTGAAGCTCTCTCCCTATATACAGATTCACGCGCAGCAATTCCCTCACTTCTCTTCTATGTGGGTCATACTCTTGAGGCCTTAATGGAGAGGTTGAATGCGATTCCACTCAGAGAACCGCCTTGCGGTGGCGAGGAGGATGATCGGAGGCTGCTGCATATCGATGGTGGTGAGCTTGACGGTGGATTGGATGGAGGAGAGGAGGAGGAGGGCGTTATGAATGGAGTGGAAGAAGTACCGCAAATGAGTTCGATGGATTTTAAGAGTAGTAATGGCTGTATGGCTCAGTCCGCCAGGACTAGTGAGCTTACCATAGCTTTTGA…
MeZML4	Manes.07G041300	ATGCCCAATTCAAATATACAAGCACCATTGCACACTGCAGAACAAATGAAAATACAGACCCAGTTGGAAGAAGAAGAAGATGAAGATATAGCTGGAGGTGGAGAAGAGTCCATAGACAACCCTAACATCCACTATGAAAATGGCACTGGAAATGCAGGTGGTGTAGACAGTTTTCCTCCTGATGATATTTGTCTTACTGGTGGACAAGATTATCCCCCGGCGGTTGGAAACGGTGGCGATGCTGACCAGCTCACTCTGTCTTTCCAGGGTGAGGTCTATGTGTTTGATGCTGTTTCCCCTGATAAGGTGCAGGCCGTGCTGTTACTTTTAGGTGGATATGAAATCCCTTCTGGTGTTCCTACTGCAGGGGCTGTCCCTCTTAACCCAAGTGGTCCAAGT…	MPNSNIQAPLHTAEQMKIQTQLEEEEDEDIAGGGEESIDNPNIHYENGTGNAGGVDSFPPDDICLTGGQDYPPAVGNGGDADQLTLSFQGEVYVFDAVSPDKVQAVLLLLGGYEIPSGVPTAGAVPLNPSGPSDLPGRSIQHQRAASLHRFREKRKERCFDKKIRYNVRKEVALRMQRKKGQFTSSKANSDGAGAASSGWNVTQGSGQDDSMLETSCTHCGTSSKSTPMMRRGPAGPRTLCNACGLKWANKGILRDLSKVSSMDLQGPPAKSTEKSEDEAKGIDAVAIATDIAAPV	AATTTGCTAATTTTCAAGCTTTCCACGCTGTCGGCTGTCGCCGAAAAATACGCCATCCTTGTTCTTTGATGCCGCAGTGGGCTGGCCGATGGCATGCCAACCCAGTGGGCACAGACCGTAATTGGTACCCATTTCTAGGGCCTATTTTCCAACCCTCTTCGTCCTCCTCTTTTCACCGCCCTTCATACCCTTTCCACCCATTATAGAAATCCCCTTTCCTTCCCAAATTTAGGTCTCTTCCTTTCTCCGTAATCTCTTCCTGGTTTCAAATTATTTTCATCTTCTGTTTGACGTTTAGTATTGTGTATCTAAATAGTAAGTCATAATCTTCAGTTGATTTTTCTATTGTTTCTTCATACGTTTTTGTTTATATTTCTCTTTCTTTTATTGGGATGTTTG…
MeZML5	Manes.10G097400	ATGCCCAGTTCAAATATACAACCATCAATGTATCCTCCAGAACCAATGAATACACGGACCCAGTTGGAAGAAGAAGATGAAGATATAGCTGGTGGTGGGGAGGAATCCATAGACAACCCTAATATCCATTATGAAAACGGGACTGGAACCGGAGGTGGTGTAGATGATGTTCCCCCTAGCGCCATTCATGTTACTGCTGGACCAGATTATCCTTTGGTCGCTGGAAATGGTGGCGATGCTGACCAGCTCACCCTATCTTTTCAGGGTGAGGTATATGTGTTTGATGCTGTTTCCCCAGATAAGGTGCAGGCAGTGCTGTTACTTCTAGGTGGATATGAAATCCCTTCTGGCATTCCTGCCCCAGTGCCTCTTAACCTGAGGGGTCCAAGTGACTTGTCT…	MPSSNIQPSMYPPEPMNTRTQLEEEDEDIAGGGEESIDNPNIHYENGTGTGGGVDDVPPSAIHVTAGPDYPLVAGNGGDADQLTLSFQGEVYVFDAVSPDKVQAVLLLLGGYEIPSGIPAPVPLNLRGPSDLSGRSIQPQRAASLRRFREKRKERCFDKKIRYSVRKEVALRMQRKKGQFTSSKASSDEAGLASSGWSATQGSGQDDSIVETLCTHCGTSSNSTPMMRRGPAGPRTLCNACGLKWANKGILRDLSKASSMRIKGPPAKPTEQGEGEANGLDIVTMAADIVSSSNGDNSTVTAET	AAGCTTCATAGGAAATCCAATCACACCACAAAGAATGAAGGCCCGCATGGTAATTTTGGAAGATTCTACCTCTGTCGCCTGAAATTCCGCCGTTGGTGTCCTTTGTTGCAGAGGCCTGGCAACTAATTCCGTGGCACAATCCGTAATTGATGTCCATTTCCAGGGCTTATCTCCTAACCCTCTTCGTCCCCATTTTCACCGCCGCTTCTTTCCCCTTTTCTCTCTTTTGACCCATCGTGGAAATCCCGTTCTCTTCCCAAATTTAGGTCTCTCTCTGCCCACGTTATTTTCTTCTATGTTTCACACTGAAGAACCAGGAAAATTAAATTATTATTATGTCTGACATTCTGTTTTGTTAATTTAATAGTTATTAATCATCTTCTGTTGAATTTTTTTATT…
MeZML6	Manes.18G056300	ATGTACGGTCATTCCCATCATATGAACGTTCATAATCAGATCGCTGCTCCTGCCGGCGATGACGAAGACGCTGCTGCTGCTGACTCTATTGATCATCATCACATTCGTTATGAAGACGGAAACGCTACTGGTGTTGTTGTAGGGGATGTCTCTTCCGATTCTGTATATGTTCCTAGCAATGGCGCTGGCTCAGAGCTCGCTGTTCATCGAGGCGATGTCTCCAGCCAACTCACATTGACTTTTCGGGGTCAAGTTTATGTGTTTGATGCTGTTACTCCTGATAAGGTTCAAGCAGTGCTTTTACTGTTGGGAGGATGTGAACTAACTTCTGGACCGTTGGAAATAGCAGCTCAAAACCAGAGGGCTGCAGTGGTGGACTTTCCAGGACGTTGCACTCAA…	MYGHSHHMNVHNQIAAPAGDDEDAAAADSIDHHHIRYEDGNATGVVVGDVSSDSVYVPSNGAGSELAVHRGDVSSQLTLTFRGQVYVFDAVTPDKVQAVLLLLGGCELTSGPLEIAAQNQRAAVVDFPGRCTQPQRAASLNRFRQKRKERCFDKKVRYSVRQEVALRMQRKKGQFTSSKKSDGTYGWGGGQDSGQDDSQQETSCTHCGISSKSTPMMRRGPSGPRSLCNACGLFWANRGTLRDLSKKTQEHSVTPIEQGEAEANDSDSGNAIHTHSNHVTY	GGCGCCTCAAACAGTCTCTCAGACTCTCACAGTCTCGCTCGCATTTTTTCTCTTTATTTTTCAACAATCCTCGCCTCTCCCTCGTTTCCCCCTTCTTTCTCTCTCCGTTTACGCTTTTTCACTCGCTCACTTGCTCAATCACTGTCGTGCTCTCTCTCACTATATTAGGGTTAGGGTTTTATACAATTTCCCCAAATTCACTTCTCTCAATCCTTTCTCTTTCTGGAATGCTTCTAAAATCTAATTTTCTCTGTCAGACTTGCCAATGTACGGTCATTCCCATCATATGAACGTTCATAATCAGATCGCTGCTCCTGCCGGCGATGACGAAGACGCTGCTGCTGCTGACTCTATTGATCATCATCACATTCGTTATGAAGACGGAAACGCTACTGGTGT…
MeZML7	Manes.18G056400	ATGGCGGCGGGAAATCCACAGCCACTGCAGGCTCGTCTTTATGAAGCGCACCTGCGAGCGCCGATACAGATCGAGGAAGACGACGGTGGAGAGTACGAGGATGGTGAAGCCATGGATGACGTAGAAGAGGCGCACATGAATTCCGGTGTAAACGTGGCAGATCATAACGACGGAGTTGGAGGTGGGGCTGGTGTGGTTATGGCGTCAAGGACCAGTGAACTTACTCTCTCTTTCGAAGGAGAGGTGTATGTTTTCCCTGCTGTTACTCCTGAGAAGGTGCAAGCAGTGCTCTTGCTCCTGGGTGGACGAGACATTCCCACTGCTGTACCTACCTTTGAAGTATCCTATGATCAAAATAACAAGGGCGTAGCGGACACCCCAAAGCACTCAAATCTTTCA…	MAAGNPQPLQARLYEAHLRAPIQIEEDDGGEYEDGEAMDDVEEAHMNSGVNVADHNDGVGGGAGVVMASRTSELTLSFEGEVYVFPAVTPEKVQAVLLLLGGRDIPTAVPTFEVSYDQNNKGVADTPKHSNLSRRIASLVRFREKRKERCFDKKIRYTVRKEVAQRMHRKNGQFASLKESSGGSSWESTKSHLQDSAPCPETFIRRCQHCGVNENNTPAMRRGPAGPRTLCNACGLMWANKGTLRDLHKGGRNVPLDQIEHETPVDVKPSIMEGEVSDNQDEHGTPEDTSKVVSEGSTNPSANPVVV	GAGGCTCTTCAAGGAAACGCGAGTGTTAGCCCCTGGAAATCTTAGCTAGTTTAGTGCTCTGCCTTTCTTTCTCATTTCCCTTCTCCTCCTTTCCATTTTCGAAGATTCTCGATAGCTCATATATAGTCCTCCAATTTCAAATTCGGGATAGGGTTCCAAAACTTTAATTTAGGAAGCCATATTCAATGAAACAGGTAGCTCCAAGCTTAGCTTAGGGTTATGTTTCTCTGTGATTGCCGGTCGGCCAGGTGCTCTAAGGGTTTTTGAATGGCGGCGGGAAATCCACAGCCACTGCAGGCTCGTCTTTATGAAGCGCACCTGCGAGCGCCGATACAGATCGAGGAAGACGACGGTGGAGAGTACGAGGATGGTGAAGCCATGGATGACGTAGAAGAGGCG…
MeTIFY1	Manes.03G065500	ATGGCCCTTCTTCTCATAATGGCTCAGCAGGGCAAAGCTTACAATGCCAACACTACCCTTAGTATTAGCGCCTGTATCAGCCTTCTTAACTCTTCTACCACCAAACACCATCGTCACCACCATCAACTGAAGGCAATGTTTCATGACTTTCTCGGCTTGAAGCCGCCTACCATCGATTCCCCTGTCGTTTTGGCCTCTAAGAACGCTGATGCGTCTCCTTCTGCCTCTATCTCTGTTGGGGCTGCCTCTTCTGGTGGTGCCCGTGCTCCCCTTTCCACCACCTCTGATCTCGCCTCTGAAAGGCAGGTTGGAAATCATCTTGAGGGTATTCCGTATTATGGTCCAAGGAGCGACATCTCTTGTTCTGAGATAAGCAACAGATTAGCAGGGAGTAAACGA…	MALLLIMAQQGKAYNANTTLSISACISLLNSSTTKHHRHHHQLKAMFHDFLGLKPPTIDSPVVLASKNADASPSASISVGAASSGGARAPLSTTSDLASERQVGNHLEGIPYYGPRSDISCSEISNRLAGSKRSNSDTAFTGTSRDGIQQMGHDSLESLHLMKMLKNGGGGERPRRSNDDEVFYGMQTMRPTSSSLILQSSSVGRLDANVSKWERSIPMGSAIQYPPRAVPANKFRDINAGPSIISQSAADEGSRTGIKGPGILSSINAGSVVSEKNSSGALPSGSKPKSGTHISEPESSTPGRQGLTSASRQMTIFYGGQAHVFDDVHPNKNTRNKSCTNIQPNKATWTSLLVAQKQNNEVKGRLKGMKCPTFNKRSITTSIRSTPFDFSNPEIKSLE…	ATGGCCCTTCTTCTCATAATGGCTCAGCAGGGCAAAGCTTACAATGCCAACACTACCCTTAGTATTAGCGCCTGTATCAGCCTTCTTAACTCTTCTACCACCAAACACCATCGTCACCACCATCAACTGAAGGCAATGTTTCATGACTTTCTCGGCTTGAAGCCGCCTACCATCGATTCCCCTGTCGTTTTGGCCTCTAAGAACGCTGATGCGTCTCCTTCTGCCTCTATCTCTGTTGGGGCTGCCTCTTCTGGTGGTGCCCGTGCTCCCCTTTCCACCACCTCTGATCTCGCCTCTGGTACGTTTTACATCTTCTTCTTCTTCTTCTTCAAATTTCTCTAGGTTTTGTTTAGATGATTTTCTTGTACCTTTATTTGATCCTTTTTTCTTTTCCACTTA…
MeTIFY2	Manes.16G067800	ATGGCTCAACAAAGCAAAGCTTACAATGCCAACACTTCTCTTAGTATTAGCGCCGGTGTCAGTCTTCTTAACACTACTAACACCCAACACCATCACCACCAAGTGAAGGCAATGTTCCATGATTTCCTCGGTATGAAGCCGGCTACCACAGATTCGCCTGTCGTTTTGGCCCCCAAGAACACTGATGCGTCTCCTTCTGCTTCTGTATCTGTTGGGGCTGCCTCTTCTGGTGGTGCCCGTGGTCCCTTTTCCACCACCTCTGATCTTGCCTCAGAAAGGCAGGCTGGAAATCATCTTGAGGGAATTCCGTTTTATGGTCCAAGGAGTGATATCTCTGGTCCTGAGATAAGCACCAGATTAGCAGGAAGTAAACGAAGTATTTCAGATTCTGCCTTCACG…	MAQQSKAYNANTSLSISAGVSLLNTTNTQHHHHQVKAMFHDFLGMKPATTDSPVVLAPKNTDASPSASVSVGAASSGGARGPFSTTSDLASERQAGNHLEGIPFYGPRSDISGPEISTRLAGSKRSISDSAFTGYTRGGNPQMGGHDSLEGLHLMKMLKNGGGGEQSRRSNDDEVSYSMHPTRPTSASLILQTSAGSRLDAHVSKWERAIPMGAAIQYPPRVGQFVPFMQQVPANKFRDVNAGPSIISQSAADEGSRTGIKGPGILSSINAGSAISEKNSSRVQPSGSKPKSGTHISEPESSAPSGRQGLTSASRQMTIFYAGQAHVFDDVHPNKADVIMALAGSNGGSWSTAYLPKPTVRPGGESSMTTGENEAGIAINTALHGRLSGTVNAAHGVGS…	TTTGCTTTTTAATGCTCTCTCTCTCTCTCTCTCTCTCTCTCTCTGTCATTATATGTCTGATTCTTTCTCTCCCTCTCGTTCTTTACCTTCTTTTTTCCTTCCTGTAAATCGTGCTCCCTTTGTTCTTTCTCTTTCTCTTAGTCACTCGACTCACTCCTTGCGTCGCTGAAGTGGGTAAAGGAGAAAGACAGCAGATATGAAGCAGCAGAAGCGTGGTATGGTGGAGATGAAGAAGTGGCCCTACTTCTGATAATGGCTCAACAAAGCAAAGCTTACAATGCCAACACTTCTCTTAGTATTAGCGCCGGTGTCAGTCTTCTTAACACTACTAACACCCAACACCATCACCACCAAGTGAAGGCAATGTTCCATGATTTCCTCGGTATGAAGCCGGCTACC…

## Sheet: Table S6
Table S6. Secondary structure of amino acid sequences of cassava TIFYs
TIFY name	Alpha helix (%)	Extended strand (%)	Beta turn (%)	Random coil (%)
MeJAZ1	0.1606	0.073	0.0328	0.7336
MeJAZ2	0.2949	0.0461	0.0276	0.6313
MeJAZ3	0.2289	0.0843	0.0402	0.6466
MeJAZ4	0.0974	0.1487	0.0333	0.7205
MeJAZ5	0.2519	0.1259	0.0481	0.5741
MeJAZ6	0.2591	0.1088	0.0415	0.5907
MeJAZ7	0.32	0.095	0.04	0.545
MeJAZ8	0.2311	0.0682	0.0341	0.6667
MeJAZ9	0.1522	0.1164	0.0239	0.7075
MeJAZ10	0.2117	0.1533	0.0438	0.5912
MeJAZ11	0.2824	0.1145	0.0458	0.5573
MeJAZ12	0.125	0.1127	0.0245	0.7377
MeJAZ13	0.3231	0.0699	0.0131	0.5939
MeJAZ14	0.1703	0.1014	0.0254	0.7029
MeJAZ15	0.2368	0.1447	0.0263	0.5921
MeJAZ16	0.1387	0.1227	0.024	0.7147
MePPD1	0.2324	0.0618	0.0294	0.6765
MePPD2	0.2053	0.0469	0.0264	0.7214
MePPD3	0.1648	0.0989	0.033	0.7033
MeZML1	0.2197	0.1014	0.0394	0.6394
MeZML2	0.186	0.1053	0.0386	0.6702
MeZML3	0.2692	0.0934	0.044	0.5934
MeZML4	0.2601	0.1115	0.0574	0.5709
MeZML5	0.2368	0.1414	0.0526	0.5691
MeZML6	0.242	0.1601	0.0569	0.5409
MeZML7	0.2117	0.1107	0.0586	0.6189
MeTIFY1	0.1591	0.1378	0.057	0.6461
MeTIFY2	0.1284	0.1307	0.0436	0.6972

## Sheet: Table S7
Table S7. The structural features of motif 1-10.
Name	E-value	Sites	Width	Amino acid sequence	Logo	Domain
Motif 1	9.4e-244	26	21	ASLQRF[LR]EKRK[ED]RCF[SD]K[KAS]P[YR][NY]		CCT_CS
Motif 2	5.7e-203	26	15	Q[LM]T[IL]F[YF]AG[TQ]V[YN]V[FY]D[AD]		Tify_dom
Motif 3	1.5e-179	7	49	[TR][RS]C[TQ]HCG[ITV]S[SE][KN][SN]TP[MA]MRRGP[AS]GPR[TS]LCNACGL[MFK]WAN[KR]G[TI]LRDLSK[GK][GST][RQS][EMN]		Znf_GATA; Znf_NHR/GATA; TIFY-like
Motif 4	1.3e-116	26	21	[PT][PA][DE]K[AV]Q[AE][IV][ML]LL[AL]GGGSSPSXX		Tify_dom
Motif 5	2.0e-060	7	23	[ST]VR[KQ]EVA[LQ]RM[QH]RK[KN]GQF[TA]S[SL]K[AEK]S		CCT
Motif 6	2.6e-037	12	26	K[SW][PGS]FS[NQ][KT][CV][SN][AL][LI][PS]Q[YI][IL][SK][EF]K[GA]S[FL][EG]D[KL][SAP]L
Motif 7	7.8e-022	7	29	[SI][IE]D[DHN][DHP][GHN][IG][EHR]YE[DN]G[ENT][AG][TM][GD][DGV][VG]V[ED]DV[PMS][NP][DS]S[VI][NY]V
Motif 8	2.4e-018	2	50	DRQSG[ST]HFT[FL]TAYPVQH[DG]VHS[MV]HHP[HY]DMKMFPFSN[HY]A[ST]SIS[LM]SNPFFKNY		HicA_toxin
Motif 9	1.3e-016	9	12	[CQ][AK][LI][GQ][AS][DE]LPIARR
Motif 10	4.9e-015	4	21	MERDF[LM]GL[GN][LS]K[EN][FPSV][LPQS][VAP][TLV]VK[EK]EV

## Sheet: Table S8
Table S8. Segmentally and tandemly duplicated cassava JAZ, PPD, and ZML gene pairs
Gene Name	Gene ID	Gene Name	Gene ID	Ka	Ka/Ks	Duplication Type	Purifying selection
MeJAZ13	Manes.16G088300	MeJAZ1	Manes.03G042500	0.692365	0.412777	Segmental duplication	Yes
MeJAZ14	Manes.16G093500	MeJAZ1	Manes.03G042500	0.103954	0.268612	Segmental duplication	Yes
MeJAZ8	Manes.11G016700	MeJAZ1	Manes.03G042500	0.477306	0.263967	Segmental duplication	Yes
MeJAZ8	Manes.11G016700	MeJAZ14	Manes.16G093500	0.441998	0.216848	Segmental duplication	Yes
MeJAZ10	Manes.15G122700	MeJAZ15	Manes.17G071600	0.184416	0.276745	Segmental duplication	Yes
MeJAZ12	Manes.15G133000	MeJAZ16	Manes.17G082100	0.131286	0.437663	Segmental duplication	Yes
MeJAZ13	Manes.16G088300	MeJAZ2	Manes.03G055200	0.124376	0.381528	Segmental duplication	Yes
MeJAZ14	Manes.16G093500	MeJAZ2	Manes.03G055200	0.731372	0.420496	Segmental duplication	Yes
MeJAZ1	Manes.03G042500	MeJAZ3	Manes.04G147900	0.492127	0.239635	Segmental duplication	Yes
MeJAZ13	Manes.16G088300	MeJAZ3	Manes.04G147900	0.659303	0.236455	Segmental duplication	Yes
MeJAZ14	Manes.16G093500	MeJAZ3	Manes.04G147900	0.391614	0.248307	Segmental duplication	Yes
MeJAZ8	Manes.11G016700	MeJAZ3	Manes.04G147900	0.164437	0.41969	Segmental duplication	Yes
MeJAZ9	Manes.14G172400	MeJAZ4	Manes.06G004000	0.15238	0.428992	Segmental duplication	Yes
MeJAZ6	Manes.08G102800	MeJAZ7	Manes.09G186200	0.109486	0.339237	Segmental duplication	Yes
MePPD3	Manes.15G032500	MePPD1	Manes.03G173500	0.126213	0.363236	Segmental duplication	Yes
MePPD1	Manes.03G173500	MePPD2	Manes.05G081400	0.414949	0.301649	Segmental duplication	Yes
MePPD3	Manes.15G032500	MePPD2	Manes.05G081400	0.506108	0.32917	Segmental duplication	Yes
MeZML5	Manes.10G097400	MeZML1	Manes.05G189500	0.460941	0.166427	Segmental duplication	Yes

## Sheet: Table S9
Table S9. Syntenic relationships of JAZ, PPD, and ZML genes between cassava and other three plant species
Paralogous gene 1	Genomic location	Paralogous gene 2	Genomic location	Ka	Ka/Ks	Purifying selection
Manes.03G042500	Me3	AT1G19180	At1	0.347089	0.152154	Yes
Manes.03G042500	Me3	AT1G72450	At1	0.544453	0.168237	Yes
Manes.03G042500	Me3	AT5G20900	At5	0.691824	0.0913689	Yes
Manes.03G055200	Me3	AT3G43440	At3	0.565798	0.212587	Yes
Manes.03G173500	Me3	AT4G14713	At4	0.401776	0.231134	Yes
Manes.04G147900	Me4	AT1G72450	At1	0.512862	0.207552	Yes
Manes.04G147900	Me4	AT1G17380	At1	0.595845	0.341574	Yes
Manes.05G081400	Me5	AT4G14713	At4	0.491262	0.166412	Yes
Manes.06G004000	Me6	AT1G48500	At1	0.445668	0.338274	Yes
Manes.06G004000	Me6	AT3G17860	At3	0.401879	0.150781	Yes
Manes.08G102800	Me8	AT5G13220	At5	0.344716	0.127886	Yes
Manes.09G186200	Me9	AT5G13220	At5	0.34379	0.384079	Yes
Manes.11G016700	Me11	AT1G72450	At1	0.447605	0.322586	Yes
Manes.11G016700	Me11	AT1G17380	At1	0.521434	0.236615	Yes
Manes.14G172400	Me14	AT1G48500	At1	0.495883	0.315447	Yes
Manes.14G172400	Me14	AT3G17860	At3	0.418566	0.271446	Yes
Manes.15G122700	Me15	AT1G30135	At1	0.583815	0.158037	Yes
Manes.15G122700	Me15	AT2G34600	At2	0.501056	0.230815	Yes
Manes.15G133000	Me15	AT1G70700	At1	0.550592	0.189346	Yes
Manes.16G088300	Me16	AT3G43440	At3	0.619793	0.215411	Yes
Manes.16G088300	Me16	AT5G20900	At5	0.446711	0.18523	Yes
Manes.16G093500	Me16	AT1G72450	At1	0.573382	0.327743	Yes
Manes.16G093500	Me16	AT1G19180	At1	0.369347	0.213703	Yes
Manes.16G093500	Me16	AT5G20900	At5	0.697611	0.324053	Yes
Manes.17G071600	Me17	AT1G30135	At1	0.467592	0.405643	Yes
Manes.17G071600	Me17	AT2G34600	At2	0.450162	0.189604	Yes
Manes.17G082100	Me17	AT1G70700	At1	0.616348	0.0981583	Yes
Manes.18G056300	Me18	AT4G24470	At4	0.290296	0.65557	Yes
Manes.03G042500	Me3	LOC_Os03g08320	Os3	0.641323	0.250772	Yes
Manes.03G042500	Me3	LOC_Os03g28940	Os3	0.769381	0.769381	Yes
Manes.03G042500	Me3	LOC_Os07g42370	Os7	0.558833	0.558833	Yes
Manes.03G042500	Me3	LOC_Os09g26780	Os9	0.470998	0.470998	Yes
Manes.04G147900	Me4	LOC_Os03g08320	Os3	0.51341	0.241988	Yes
Manes.04G147900	Me4	LOC_Os03g28940	Os3	0.823959	0.823959	Yes
Manes.04G147900	Me4	LOC_Os07g42370	Os7	0.697518	0.697518	Yes
Manes.04G147900	Me4	LOC_Os09g26780	Os9	0.706226	0.706226	Yes
Manes.08G102800	Me8	LOC_Os04g32480	Os4	0.807175	0.807175	Yes
Manes.09G186200	Me9	LOC_Os04g32480	Os4	0.843712	0.843712	Yes
Manes.11G016700	Me11	LOC_Os03g28940	Os3	0.58355	0.58355	Yes
Manes.11G016700	Me11	LOC_Os03g08320	Os3	0.694863	0.694863	Yes
Manes.11G016700	Me11	LOC_Os07g42370	Os7	0.451567	0.451567	Yes
Manes.11G016700	Me11	LOC_Os09g26780	Os9	0.586275	0.586275	Yes
Manes.16G093500	Me16	LOC_Os03g28940	Os3	0.455383	0.204221	Yes
Manes.16G093500	Me16	LOC_Os03g08320	Os3	0.649455	0.649455	Yes
Manes.16G093500	Me16	LOC_Os07g42370	Os7	0.555688	0.555688	Yes
Manes.16G093500	Me16	LOC_Os09g26780	Os9	0.793333	0.793333	Yes
Manes.03G042500	Me3	Potri.001G166200	Pt1	0.478437	0.245763	Yes
Manes.03G042500	Me3	Potri.003G068900	Pt3	0.462505	0.162085	Yes
Manes.03G042500	Me3	Potri.006G139400	Pt6	0.186323	0.226516	Yes
Manes.03G055200	Me3	Potri.006G217200	Pt6	0.223815	0.349919	Yes
Manes.03G055200	Me3	Potri.018G047100	Pt18	0.254288	0.390934	Yes
Manes.03G173500	Me3	Potri.002G048500	Pt2	0.404543	0.197649	Yes
Manes.03G173500	Me3	Potri.005G214300	Pt5	0.399843	0.268118	Yes
Manes.04G147900	Me4	Potri.001G166200	Pt1	0.292183	0.344658	Yes
Manes.04G147900	Me4	Potri.003G068900	Pt3	0.278224	0.359136	Yes
Manes.04G147900	Me4	Potri.006G139400	Pt6	0.468538	0.167667	Yes
Manes.05G081400	Me5	Potri.002G048500	Pt2	0.206368	0.287423	Yes
Manes.05G081400	Me5	Potri.005G214300	Pt5	0.215985	0.324568	Yes
Manes.05G189500	Me5	Potri.002G110800	Pt2	0.092656	0.152551	Yes
Manes.05G189500	Me5	Potri.005G152500	Pt5	0.10238	0.166771	Yes
Manes.06G004000	Me6	Potri.012G044900	Pt12	0.251092	0.508378	Yes
Manes.06G004000	Me6	Potri.015G035800	Pt15	0.229085	0.435495	Yes
Manes.07G041200	Me7	Potri.007G116700	Pt7	0.182438	0.237698	Yes
Manes.07G041200	Me7	Potri.017G042200	Pt17	0.188528	0.249952	Yes
Manes.08G102800	Me8	Potri.001G062500	Pt1	0.189734	0.238185	Yes
Manes.08G102800	Me8	Potri.003G165000	Pt3	0.196925	0.225143	Yes
Manes.09G186200	Me9	Potri.001G062500	Pt1	0.204482	0.304546	Yes
Manes.09G186200	Me9	Potri.003G165000	Pt3	0.19042	0.251941	Yes
Manes.11G016700	Me11	Potri.001G166200	Pt1	0.293215	0.339544	Yes
Manes.11G016700	Me11	Potri.003G068900	Pt3	0.26103	0.309016	Yes
Manes.11G016700	Me11	Potri.006G139400	Pt6	0.408236	0.163852	Yes
Manes.14G172400	Me14	Potri.012G044900	Pt12	0.224312	0.356066	Yes
Manes.14G172400	Me14	Potri.015G035800	Pt15	0.213714	0.288529	Yes
Manes.15G032500	Me15	Potri.002G048500	Pt2	0.4835	0.272095	Yes
Manes.15G032500	Me15	Potri.005G214300	Pt5	0.512493	0.284685	Yes
Manes.15G122700	Me15	Potri.011G083900	Pt11	0.342533	0.232867	Yes
Manes.15G133000	Me15	Potri.008G133400	Pt8	0.191848	0.354383	Yes
Manes.15G133000	Me15	Potri.010G108200	Pt10	0.269752	0.416375	Yes
Manes.16G088300	Me16	Potri.006G217200	Pt6	0.238796	0.421848	Yes
Manes.16G088300	Me16	Potri.006G139400	Pt6	0.726272	0.437329	Yes
Manes.16G088300	Me16	Potri.018G047100	Pt18	0.246903	0.323873	Yes
Manes.16G093500	Me16	Potri.001G166200	Pt1	0.41131	0.21341	Yes
Manes.16G093500	Me16	Potri.003G068900	Pt3	0.435454	0.240633	Yes
Manes.16G093500	Me16	Potri.006G139400	Pt6	0.203253	0.274046	Yes
Manes.16G093500	Me16	Potri.006G217200	Pt6	0.766594	0.437174	Yes
Manes.16G093500	Me16	Potri.018G047100	Pt18	0.819209	0.392475	Yes
Manes.17G071600	Me17	Potri.011G083900	Pt11	0.362936	0.222009	Yes
Manes.17G082100	Me17	Potri.008G133400	Pt8	0.223237	0.34244	Yes
Manes.17G082100	Me17	Potri.010G108200	Pt10	0.234274	0.351656	Yes
Manes.18G056300	Me18	Potri.002G110800	Pt2	0.440673	0.252256	Yes
Manes.18G056300	Me18	Potri.005G152500	Pt5	0.466938	0.095308	Yes
Manes.18G056400	Me18	Potri.007G116700	Pt7	0.354363	0.292871	Yes

## Sheet: Table S10
Table S10. Summary of putative stress- or hormone-responsive cis-acting regulatory elements in the promoter regions of cassava JAZ, PPD, and ZML genes.
Category	Cis-acting element	Sequence	Annotation	MeZML1	MeZML2	MeZML3	MeZML4	MeZML5	MeZML6	MeZML7	MeJAZ1	MeJAZ2	MeJAZ3	MeJAZ4	MeJAZ5	MeJAZ6	MeJAZ7	MeJAZ8	MeJAZ9	MeJAZ1	MeJAZ11	MeJAZ12	MeJAZ13	MeJAZ14	MeJAZ15	MeJAZ16	MePPD1	MePPD2	MePPD3
Abiotic and biotic stresses	MYB	CAACCA	related to plant stress response	1						1	2	1	3	1	1	2	3		1	5		2		1	1				3
	MYC	CATGTG	related to plant stress response	2										1			1		1	5				1	1			1	1
	TC-rich repeats	GTTTTCTTAC	cis-acting element involved in defense and stress responsiveness																	1									1
	DRE core	GCCGAC	cis-acting element involved in drought				1			1	1		1					1							2
	MBS	CAACTG	MYB binding site involved in drought-inducibility				2		2	2		2		2				2		2					2	2
	STRE	AGGGG	cis-acting element involved in heat stress		2	1	2	2	2	2	1		1			1	4	2	1	2	4		1	4	4	1	3	2	1
	W box	TTGACC	pathogen responsive element			1		1	2	1			1	1	1		1	1		1	1	1	2		1	1	1	1
	WUN-motif	AAATTACT	wound-responsive element	1		1								1	1			1		1	1			1		1	1
	LTR	CCGAAA	cis-acting element involved in low temperature responsiveness		2	1	2	1	1	1	1							1	1		1	1			1
Phytohormone responses	ABRE	ACGTG	cis-acting element involved in the abscisic acid responsiveness					1	2	2	3	1	3	4			2	7	3	3	2	8	2	3	3	4	3	3
	CGTCA-motif	CGTCA	cis-acting regulatory element involved in the MeJA-responsiveness				2		2			2	3	2			3	1			1	2	1	1	2			5	2
	TGACG-motif	TGACG	cis-acting regulatory element involved in the MeJA-responsiveness				2		2			2	3	2			3	1			1	2	1	1	2			5	2
	GARE-motif	TCTGTTG	gibberellin-responsive element					1				1		1														1
	P-box	CCTTTTG	gibberellin-responsive element					3		1	1				1				1				2
	TATC-box	TATCCCA	cis-acting element involved in gibberellin-responsiveness					1		1	1					1			1								1
	ERE	ATTTTAAA	cis-acting element involved inethylene-responsive element	1	5	12	8	5			3	5	5	9	8	2	1	3	3	6	8	2	3	3	1	9	8	2	2
	TCA-element	TCAGAAGAGG	cis-acting element involved in salicylic acid responsiveness						1					1			1					1						1
	TGA-element	AACGAC	auxin-responsive element		1				3		1			1	1			1	1				2				1
	AuxRR-core	GGTCCAT	cis-acting regulatory element involved in auxin responsiveness																					1

[truncated: 2 more sheets: Table S11, Table S12]
